# Supplementary material
Source: publisher site journal article supplement (https://static.cambridge.org/content/id/urn:cambridge.org:id:article:S1049096521000810/resource/name/S1049096521000810supp001.pdf)
Supplement: Supplementary file 1 [file S1049096521000810supp001.pdf]

## APPENDIX

## Tables of Examples

**Table A1. Omit needless words**

| Original                                                                                                             | Revised                                                 |
|----------------------------------------------------------------------------------------------------------------------|---------------------------------------------------------|
| less malfeasant challenger parties (x11)                                                                             | challengers                                             |
| information diffusion (x22)                                                                                          | diffusion                                               |
| networks' coordination and information diffusion functions                                                           | coordination and diffusion                              |
| informal enforcement mechanisms (x5)                                                                                 | informal enforcement                                    |
| robustly statistically significant conditional effect                                                                | conditional effect                                      |
| post-merge analyses (x18)                                                                                            | analyses                                                |
| comprehensive simulation studies (x2)                                                                                | simulations                                             |
| canonical probabilistic record linkage model                                                                         | probabilistic matching                                  |
| instrumental variable approach                                                                                       | instrumental variable                                   |
| an exacerbated reaction to a contemporaneous trigger                                                                 | a momentary overreaction                                |
| local economic conditions (x41)                                                                                      | local economy                                           |
| state-owned firm's storage procedures                                                                                | firm's procedures                                       |
| could potentially be imposing negative externalities on the quality                                                  | could be reducing the quality                           |
| lengthy and potentially risky semi-public trials                                                                     | lengthy trials                                          |
| knowledge-based service sector economy                                                                               | knowledge economy                                       |
| experimenter demand effects                                                                                          | experimenter demand                                     |
| experimental participants / treatments / results / research / design (x47)                                           | participants / treatments / results / research / design |
| traditional survey experimental designs                                                                              | survey experiments                                      |
| conveying demand characteristics to experimental participants in laboratory settings                                 | conveying demand to participants in laboratories        |
| borderline statistically significant five-percentage-point increase                                                  | nonsignificant difference                               |
| greater behavioral opposition                                                                                        | greater opposition                                      |
| theoretically plausible alternative explanations                                                                     | theories                                                |
| while this coercion might take a variety of forms, in the extreme, this manifests in the shuttering of media outlets | this coercion includes shutting down media              |
| potentially valuable extra-local relationships                                                                       | these relationships                                     |
| carry a causal interpretation and are consistent with a story of                                                     | indicate that                                           |
| it is simply not feasible to expect any individual to develop detailed knowledge about                               | someone cannot learn the details about                  |
| randomization-based research designs (x2)                                                                            | randomized experiments                                  |
| naturally-occurring relationship networks                                                                            | natural networks                                        |
| unobtrusive, ordinary course-of-business manner                                                                      | in the ordinary course of business                      |

**Table A2. Replace nebulous nouns**

| Original                                                                                                                               | Revised                                                        |
|----------------------------------------------------------------------------------------------------------------------------------------|----------------------------------------------------------------|
| incumbent performance information (x5)                                                                                                 | reported misspending                                           |
| to empirically separate the coordination and diffusion mechanisms through which networks moderate the effects of information provision | to test whether networks help voters coordinate or communicate |
| subjective evaluations (x19)                                                                                                           | opinions                                                       |
| socially generated (x12) / supplied (x8) / transmitted (x5) / communicated (x4) information                                            | messages from peers                                            |
| private economic activity (x22)                                                                                                        | trade                                                          |
| endogenous organizational solutions                                                                                                    | private solutions                                              |
| can be endogenous to societal characteristics                                                                                          | depends on the society                                         |
| the need to mitigate the adverse effects of social fragmentation in diverse populations                                                | the need to resolve conflicts in diverse populations           |
| highly heterogeneous entities                                                                                                          | very different                                                 |
| the logical expectation is that transitions to democratic governance should have profound impacts on inequality levels                 | adopting democracy should profoundly impact inequality         |
| written into democratic governance structures                                                                                          | written into law                                               |
| parents may adopt external behaviors that are compatible with an authority's moral demands                                             | parents may comply with an authority's demands                 |
| ignoring the endogenous part that is driven by preexisting differences in attitudes toward refugees                                    | ignoring refugees' preference for friendlier islands           |
| more general anti-immigrant policy preferences and attitudes                                                                           | general opposition to immigrants                               |
| local residential context                                                                                                              | neighborhood                                                   |
| egotropic pocketbook concerns                                                                                                          | personal finances                                              |
| the level of journalistic resources dedicated to coverage of local politics                                                            | journalism about local politics                                |
| locally tailored politics content                                                                                                      | local politics                                                 |
| the ideological valence of their news diet lurched rightward                                                                           | their news became more conservative                            |
| contextual effects (x25)                                                                                                               | contact with immigrants                                        |
| of our incentive-based EDE interventions                                                                                               | for the effects of incentives                                  |
| significant autonomous political resources                                                                                             | independent funds and supporters                               |
| political opportunity structure (x11)                                                                                                  | threat of punishment                                           |
| previously suppressed anti-regime sentiments                                                                                           | resentment                                                     |
| Moscow's local coercive leverage                                                                                                       | Moscow's threat                                                |
| have a negative causal effect on                                                                                                       | decrease                                                       |
| engage in criminal behavior                                                                                                            | commit a crime                                                 |
| prior causally-oriented research                                                                                                       | previous experiments                                           |
| self-selected communication networks (x2)                                                                                              | networks of legislators                                        |
| individual information constraints                                                                                                     | limited knowledge                                              |
| the self-selection that characterizes the network's formation                                                                          | the choice of peers                                            |

**Table A3. Add missing prepositions**

| Original                                                                      | Revised                                                                  |
|-------------------------------------------------------------------------------|--------------------------------------------------------------------------|
| precinct-level electoral returns (x2)                                         | electoral returns <u>by</u> precinct                                     |
| locality-level network connectedness measures                                 | network connectedness <u>by</u> locality                                 |
| randomized precinct-level information provision indicator                     | indicator <u>of</u> the audit reports randomized <u>across</u> precincts |
| information diffusion chain                                                   | chain <u>of</u> communication                                            |
| example socially transmitted messages                                         | examples <u>of</u> messages                                              |
| heterogeneous migrant communities (x3)                                        | diverse communities <u>of</u> migrants                                   |
| more frequent and encompassing state-society interactions                     | more interactions <u>with</u> the state                                  |
| high- and low-inequality autocratic countries                                 | autocracies <u>with</u> high and low inequality                          |
| 90th percentile predemocracy inequality level                                 | 90th percentile <u>of</u> inequality <u>before</u> democracy             |
| available within-state and across-state migration rates                       | rates <u>of</u> migration <u>within</u> and <u>across</u> states         |
| anti-immigrant sentiment / attitudes / preferences / policy preferences (x16) | hostility <u>against</u> immigrants                                      |
| individual-level outcome measures                                             | measures <u>of</u> individuals                                           |
| anti-refugee political engagement                                             | political engagement <u>against</u> refugees                             |
| county-level unemployment rates                                               | unemployment <u>in</u> counties                                          |
| street-level drug markets                                                     | drug markets <u>on</u> the street                                        |
| firm-level field experiment                                                   | field experiment <u>on</u> firms                                         |
| average participation treatment effect                                        | average effect <u>of</u> participation                                   |
| cross-station ideological distribution                                        | distribution of ideology <u>across</u> stations                          |
| more nationally focused and ideologically conservative coverage               | national news <u>with</u> a conservative slant                           |
| positive immigration attitudes (x19)                                          | support <u>for</u> immigration                                           |
| city-level contextual effects                                                 | the effect <u>of</u> living <u>in</u> cities                             |
| empirical political science subfields (x2)                                    | subfields <u>of</u> political science                                    |
| that involve substantial researcher-subject interaction                       | where researchers interact <u>with</u> participants                      |
| absolute value percentage-point shifts                                        | the absolute change <u>in</u> percentage points                          |
| federal anti-lynching legislation (x4)                                        | federal legislation <u>against</u> lynching                              |
| electoral district-level voting results                                       | voting results <u>by</u> district                                        |
| historical monthly mean air temperature and precipitation data                | monthly means <u>for</u> temperature and precipitation                   |
| Reich's own coercive food extraction practices                                | Reich's own confiscation <u>of</u> food                                  |
| greater and more geographically dispersed coverage                            | more coverage <u>in</u> a wider area                                     |
| first-time misdemeanor defendants (x5)                                        | defendants <u>for</u> first-time misdemeanors                            |
| pre-arrest voter histories (x2)                                               | voting <u>before</u> the arrest                                          |
| sufficient courtroom-level sentencing variation                               | sufficient variation <u>in</u> sentences <u>across</u> courtrooms        |
| legislators' relatively unfiltered individual policy priorities               | legislators' positions <u>on</u> many policies                           |
| bill and legislator-specific indicator variables                              | indicators <u>for</u> bill and legislator                                |

**Table A4. Let verbs be verbs**

| Original                                                                                                                                                                                                                          | Revised                                                                                                                                                                                                                   |
|-----------------------------------------------------------------------------------------------------------------------------------------------------------------------------------------------------------------------------------|---------------------------------------------------------------------------------------------------------------------------------------------------------------------------------------------------------------------------|
| incumbent malfeasance <u>revelations</u>                                                                                                                                                                                          | <u>revealing</u> an incumbent's misspending                                                                                                                                                                               |
| can facilitate electoral <u>sanctioning</u> by stimulating voter <u>coordination</u>                                                                                                                                              | can <u>sanction</u> politicians by <u>coordinating</u> voters                                                                                                                                                             |
| who are more <u>knowledgeable</u> (x6)                                                                                                                                                                                            | who <u>know</u> more                                                                                                                                                                                                      |
| there is an empirical <u>contribution</u> in this paper by providing new evidence                                                                                                                                                 | this paper <u>contributes</u> new evidence                                                                                                                                                                                |
| prevent the <u>identification</u> and <u>punishment</u> of uncooperative individuals                                                                                                                                              | prevent people from <u>catching</u> and <u>punishing</u> cheaters                                                                                                                                                         |
| <u>provision</u> of pro-poor public goods                                                                                                                                                                                         | <u>providing</u> public goods to the poor                                                                                                                                                                                 |
| should be <u>heterogeneous according to</u> (x2)                                                                                                                                                                                  | should <u>depend on</u>                                                                                                                                                                                                   |
| we first conduct a within-state <u>merge</u> for each state followed by across-state <u>merges</u>                                                                                                                                | we first <u>merge</u> within each state and then <u>merge</u> across states                                                                                                                                               |
| has been identified as one of the key <u>impediments</u> to studies have relied on laboratory <u>manipulations</u> in perceptions                                                                                                 | <u>impedes</u><br>previous studies <u>manipulated</u> perceptions                                                                                                                                                         |
| to identify the causal <u>effect</u> of societal discrimination on the <u>integration decisions</u> of immigrant minorities                                                                                                       | to see how discrimination <u>affects</u> immigrants' decisions to <u>integrate</u>                                                                                                                                        |
| direct <u>exposure</u> to refugee arrivals induces sizeable and lasting <u>increases in natives' hostility</u> toward refugees                                                                                                    | natives who <u>encounter</u> refugees <u>feel more hostile</u> toward them                                                                                                                                                |
| this lacuna is problematic for our <u>theoretical understanding</u> of                                                                                                                                                            | we do not <u>understand</u>                                                                                                                                                                                               |
| the migrant's <u>decision-making process</u> that determines has statistically and politically meaningful <u>effects</u> on prison-based criminal <u>governance</u> (x2)                                                          | how migrants <u>decide</u><br><u>affects</u>                                                                                                                                                                              |
| the PCC's consignment-based drug <u>trafficking</u> business, its relatively mild and "sympathetic" <u>punishment</u> regime, and resource-intensive <u>recordkeeping</u> , and its <u>use</u> of profits for collective benefits | how leaders <u>govern</u> gangs from prison<br>the gang <u>trafficks</u> drugs by consignment,<br><u>punishes</u> misconduct mildly, <u>keeps</u><br>detailed records, and <u>uses</u> profits for<br>collective benefits |
| regulatory <u>design</u> process (x10)                                                                                                                                                                                            | <u>designing</u> regulations                                                                                                                                                                                              |
| substantive <u>change</u> mechanism (x14)                                                                                                                                                                                         | <u>changing</u> policy                                                                                                                                                                                                    |
| our study design involved random <u>assignment</u> of sampled firms                                                                                                                                                               | we randomly <u>assigned</u> firms                                                                                                                                                                                         |
| for the <u>design</u> , <u>implementation</u> , and <u>interpretation</u> of Stalin's coercive <u>agricultural policy</u> and collective <u>punishment</u> campaign (x2)                                                          | for how to <u>design</u> , <u>implement</u> , and <u>interpret</u><br>Stalin's campaign to <u>starve</u> and <u>punish</u><br>dissenters                                                                                  |
| are <u>dynamic</u> and <u>contingent</u> on a <u>changing contemporary context</u>                                                                                                                                                | <u>change</u> over time                                                                                                                                                                                                   |
| spatial and temporal <u>variation</u> in discourse institutions through which public <u>legitimation</u> can be accomplished                                                                                                      | how discourse <u>varies</u> by place and time<br>institutions that <u>legitimize</u> violence                                                                                                                             |
| identifies the <u>contagion effect</u> of the treatment on subjects who are exposed to it through a peer                                                                                                                          | tests whether legislators <u>learn</u> from peers                                                                                                                                                                         |

### Full Set of Phrases from the *APSR* with Citations

We collected 1,101 phrases from the 18 Research Articles in Volume 113, Issue 2 of the *American Political Science Review*. We selected the *APSR* to represent the best writing in the field. In each article, we focused on beginning of the Introduction and Discussion, where the writing should be more accessible and less technical than the methods or results.

Table A5 shows the full set of phrases. For each phrase, we indicate the reference by the article's number (ordered alphabetically by the first author's last name), following the numbered list below. The numbering of the phrases (second column) indicates the order in which they appear in the article. Repeated phrases have the number of repetitions in parentheses, such as (x5) for 5 times.

The Category of the phrase indicates the principle of style that is most relevant for the revision, following the sections of the main text. The labels are: "piled" for piled modifiers, "needless" for needless words, "nebulous" for nebulous nouns, "preposition" for missing prepositions, "verb" for buried verbs, and "abbreviation" for abbreviations. Many phrases fit multiple categories but we list only the most relevant.

The adequacy of most revisions should be obvious. But in some cases, the reasons include previous text that we could not conveniently reproduce in the table. We refer readers to the original article to fully consider the revisions.

The reference numbers are as follows:

1. Arias, Eric et al. 2019. "Information Provision, Voter Coordination, and Electoral Accountability: Evidence from Mexican Social Networks." *American Political Science Review* 113(2): 475–98.
2. Carlson, Taylor N. 2019. "Through the Grapevine: Informational Consequences of Interpersonal Political Communication." *American Political Science Review* 113(2): 325–39.
3. Charnysh, Volha. 2019. "Diversity, Institutions, and Economic Outcomes: Post-WWII Displacement in Poland." *American Political Science Review* 113(2): 423–41.
4. Dorsch, Michael T, and Paul Maarek. 2019. "Democratization and the Conditional Dynamics of Income Distribution." *American Political Science Review* 113(2): 385–404.
5. Enamorado, Ted, Benjamin Fifield, and Kosuke Imai. 2019. "Using a Probabilistic Model to Assist Merging of Large-Scale Administrative Records." *American Political Science Review* 113(2): 353–71.
6. Fouka, Vasiliki. 2019. "How Do Immigrants Respond to Discrimination? The Case of Germans in the US During World War I." *American Political Science Review* 113(2): 405–22.
7. Hangartner, Dominik et al. 2019. "Does Exposure to the Refugee Crisis Make Natives More Hostile?" *American Political Science Review* 113(2): 442–55.
8. Larsen, Martin Vinæs, Frederik Hjorth, Peter Thisted Dinesen, and Kim Mannemar Sønderskov. 2019. "When Do Citizens Respond Politically to the Local Economy?"

- Evidence from Registry Data on Local Housing Markets.” *American Political Science Review* 113(2): 499–516.
9. Lessing, Benjamin, and Graham Denyer Willis. 2019. “Legitimacy in Criminal Governance: Managing a Drug Empire from Behind Bars.” *American Political Science Review* 113(2): 584–606.
  10. Malesky, Edmund, and Markus Taussig. 2019. “Participation, Government Legitimacy, and Regulatory Compliance in Emerging Economies: A Firm-Level Field Experiment in Vietnam.” *American Political Science Review* 113(2): 530–51.
  11. Martin, Gregory J, And Joshua McCrain. 2019. “Local News and National Politics.” *American Political Science Review* 113(2): 372–84.
  12. Maxwell, Rahsaan. 2019. “Cosmopolitan Immigration Attitudes in Large European Cities: Contextual or Compositional Effects?” *American Political Science Review* 113(2): 456–74.
  13. Mummolo, Jonathan, and Erik Peterson. 2019. “Demand Effects in Survey Experiments: An Empirical Assessment.” *American Political Science Review* 113(2): 517–29.
  14. Reuter, Ora John, and David Szakonyi. 2019. “Elite Defection under Autocracy: Evidence from Russia.” *American Political Science Review* 113(2): 552–68.
  15. Rozenas, Arturas, and Yuri M Zhukov. 2019. “Mass Repression and Political Loyalty: Evidence from Stalin’s ‘Terror by Hunger.’” *American Political Science Review* 113(2): 569–83.
  16. Weaver, Michael. 2019. “‘Judge Lynch’ in the Court of Public Opinion: Publicity and the De-Legitimation of Lynching.” *American Political Science Review* 113(2): 293–310.
  17. White, Ariel. 2019. “Misdemeanor Disenfranchisement? The Demobilizing Effects of Brief Jail Spells on Potential Voters.” *American Political Science Review* 113(2): 311–24.
  18. Zelizer, Adam. 2019. “Is Position-Taking Contagious? Evidence of Cue-Taking from Two Field Experiments in a State Legislature.” *American Political Science Review* 113(2): 340–52.

**Table A5. Original Phrases and Revisions**

| <b>Ref. No.</b> | <b>Original</b> | <b>Revised</b>                                                                                                                         | <b>Category</b>                                                     |             |
|-----------------|-----------------|----------------------------------------------------------------------------------------------------------------------------------------|---------------------------------------------------------------------|-------------|
| 1               | 1               | information provision (x80)                                                                                                            | reporting malfeasance                                               | nebulous    |
| 1               | 2               | incumbent malfeasance revelations                                                                                                      | revealing an incumbent's misspending                                | verb        |
| 1               | 3               | incumbent malfeasance (x12)                                                                                                            | mayor's misspending                                                 | nebulous    |
| 1               | 4               | less malfeasant challenger parties (x11)                                                                                               | challengers                                                         | needless    |
| 1               | 5               | highly connected voter networks                                                                                                        | connected networks                                                  | needless    |
| 1               | 6               | incumbent party malfeasance                                                                                                            | the mayor's misspending                                             | nebulous    |
| 1               | 7               | incumbent malfeasance information                                                                                                      | reported misspending                                                | nebulous    |
| 1               | 8               | detailed family network data                                                                                                           | detailed data about family networks                                 | preposition |
| 1               | 9               | incumbent party vote share                                                                                                             | votes for the incumbent                                             | preposition |
| 1               | 10              | greater network connectedness                                                                                                          | where voters are more connected                                     | nebulous    |
| 1               | 11              | individual-level data                                                                                                                  | surveys                                                             | nebulous    |
| 1               | 12              | poorly performing politicians                                                                                                          | corrupt politicians                                                 | nebulous    |
| 1               | 13              | incumbent performance information (x5)                                                                                                 | reported misspending                                                | nebulous    |
| 1               | 14              | incumbent party performance                                                                                                            | politician's misspending                                            | nebulous    |
| 1               | 15              | social network connectedness                                                                                                           | networks                                                            | needless    |
| 1               | 16              | community's electoral sanctioning                                                                                                      | community's votes                                                   | nebulous    |
| 1               | 17              | may induce explicit discussion about, and agreement on, voting for a better candidate                                                  | may lead people to discuss and agree to vote for a better candidate | verb        |
| 1               | 18              | information diffusion (x22)                                                                                                            | diffusion                                                           | needless    |
| 1               | 19              | social networks' diffusion or coordination mechanisms                                                                                  | diffusion or coordination                                           | needless    |
| 1               | 20              | information diffusion and coordination functions                                                                                       | diffusion and coordination                                          | needless    |
| 1               | 21              | our empirical context (x9)                                                                                                             | our study                                                           | nebulous    |
| 1               | 22              | simple two-party model                                                                                                                 | simple model with two parties                                       | preposition |
| 1               | 23              | incumbents' greater vote-buying capacity                                                                                               | incumbents' appeal                                                  | nebulous    |
| 1               | 24              | embedded in more connected networks                                                                                                    | with more connections                                               | nebulous    |
| 1               | 25              | less malfeasant party                                                                                                                  | better party                                                        | needless    |
| 1               | 26              | less malfeasant candidate                                                                                                              | better candidate                                                    | needless    |
| 1               | 27              | networks' coordination and diffusion mechanisms                                                                                        | coordination and diffusion                                          | needless    |
| 1               | 28              | networks' potential coordination and diffusion functions                                                                               | coordination and diffusion                                          | needless    |
| 1               | 29              | information diffusion channel                                                                                                          | diffusion                                                           | needless    |
| 1               | 30              | to empirically separate the coordination and diffusion mechanisms through which networks moderate the effects of information provision | to test whether networks help voters coordinate or communicate      | nebulous    |
| 1               | 31              | audit report scorecards                                                                                                                | audit reports                                                       | needless    |
| 1               | 32              | misallocated municipal spending                                                                                                        | misspending                                                         | needless    |
| 1               | 33              | substantial incumbent malfeasance                                                                                                      | substantial malfeasance                                             | needless    |
| 1               | 34              | audit report information                                                                                                               | reported misspending                                                | needless    |
| 1               | 35              | networks' coordinating role                                                                                                            | network coordination                                                | needless    |
| 1               | 36              | information diffusion function                                                                                                         | network diffusion                                                   | needless    |
| 1               | 37              | field experimental variation                                                                                                           | a field experiment that varies                                      | verb        |
| 1               | 38              | precinct-level electoral returns (x2)                                                                                                  | electoral returns by precinct                                       | preposition |
| 1               | 39              | individual-level networks                                                                                                              | networks of individuals                                             | preposition |

| <b>Ref. No.</b> | <b>Original</b> | <b>Revised</b>                                                              | <b>Category</b>                                                     |             |
|-----------------|-----------------|-----------------------------------------------------------------------------|---------------------------------------------------------------------|-------------|
| 1               | 40              | Mexico's nationwide conditional cash transfer program                       | Mexico's program for giving cash to the poor                        | preposition |
| 1               | 41              | precinct-level voting behavior                                              | differences in voting across precincts                              | preposition |
| 1               | 42              | voting behavior (x7)                                                        | voting                                                              | needless    |
| 1               | 43              | information provision can also induce voter coordination against candidates | reporting misspending can help voters coordinate against candidates | verb        |
| 1               | 44              | networks' coordination and information diffusion functions                  | coordination and diffusion                                          | needless    |
| 1               | 45              | average informational treatment effects                                     | average effects of information                                      | preposition |
| 1               | 46              | politically engaged social network                                          | network                                                             | needless    |
| 1               | 47              | average voter posterior perceptions                                         | average perceptions                                                 | needless    |
| 1               | 48              | nonpartisan transparency non-government organization (NGO) Borde Politico   | Borde Politico, a non-governmental organization for transparency    | piled       |
| 1               | 49              | major nationwide conditional cash transfer program                          | nationwide program that gives cash to the poor                      | piled       |
| 1               | 50              | locality-level network connectedness measures                               | network connectedness by locality                                   | piled       |
| 1               | 51              | individual-level survey data                                                | survey data                                                         | needless    |
| 1               | 52              | individual-level survey outcomes                                            | survey measures                                                     | needless    |
| 1               | 53              | randomized precinct-level information provision indicator                   | indicator of the audit reports randomized across precincts          | piled       |
| 1               | 54              | precinct-level incumbent party electoral support                            | support for the incumbent                                           | piled       |
| 1               | 55              | individual-level interactive controls                                       | controls                                                            | needless    |
| 1               | 56              | can facilitate electoral sanctioning by stimulating voter coordination      | can sanction politicians by coordinating voters                     | verb        |
| 1               | 57              | networks' coordination and information diffusion roles                      | coordination and diffusion                                          | needless    |
| 1               | 58              | precinct- and individual-level data                                         | data for precincts and individuals                                  | preposition |
| 1               | 59              | potentially superior political outcomes                                     | better leaders                                                      | nebulous    |
| 1               | 60              | networks' coordination and information diffusion mechanisms                 | coordination and diffusion                                          | piled       |
| 1               | 61              | observationally equivalent                                                  | look the same                                                       | nebulous    |
| 1               | 62              | social networks' coordination and diffusion functions                       | coordination and diffusion                                          | needless    |
| 1               | 63              | information dissemination campaigns                                         | information campaigns                                               | needless    |
| 2               | 1               | interpersonal political information                                         | discussing politics                                                 | nebulous    |
| 2               | 2               | "telephone-game" experiment                                                 | experiment with a telephone game                                    | preposition |
| 2               | 3               | social information (x15)                                                    | news from peers                                                     | nebulous    |
| 2               | 4               | empirically different                                                       | different                                                           | needless    |
| 2               | 5               | participants exposed to social information                                  | participants who learned the news from peers                        | verb        |
| 2               | 6               | subjective evaluations (x19)                                                | opinions                                                            | nebulous    |
| 2               | 7               | social information exchanges                                                | discussions                                                         | nebulous    |
| 2               | 8               | "two-step flow" of information                                              | chain of communication                                              | nebulous    |
| 2               | 9               | who are more knowledgeable (x6)                                             | who know more                                                       | verb        |
| 2               | 10              | rational information shortcut                                               | rational shortcut                                                   | needless    |



| Ref. No. | Original                                                                                                                                      | Revised                                                              | Category    |
|----------|-----------------------------------------------------------------------------------------------------------------------------------------------|----------------------------------------------------------------------|-------------|
| 2        | 11 socially generated (x12) / supplied (x8) / transmitted (x5) / communicated (x4) information                                                | messages from peers                                                  | nebulous    |
| 2        | 12 social information transmission (x6)                                                                                                       | communication                                                        | nebulous    |
| 2        | 13 self-educating potential                                                                                                                   | ability to learn                                                     | nebulous    |
| 2        | 14 controlled lab experiments                                                                                                                 | lab experiments                                                      | needless    |
| 2        | 15 in the social transmission stage of the two-step flow                                                                                      | when people tell others                                              | nebulous    |
| 2        | 16 socially generated political information (x2)                                                                                              | news from peers                                                      | nebulous    |
| 2        | 17 socially generated (x8) / supplied (x1) / transmitted (x7) messages                                                                        | messages from peers                                                  | nebulous    |
| 2        | 18 individuals transmitted information                                                                                                        | participants sent messages                                           | nebulous    |
| 2        | 19 held significantly more positive evaluations                                                                                               | were more approving                                                  | nebulous    |
| 2        | 20 social informational shortcuts                                                                                                             | social learning                                                      | nebulous    |
| 2        | 21 dyadic informant-recipient dynamics                                                                                                        | strategic communication                                              | nebulous    |
| 2        | 22 individuals can transmit political information                                                                                             | people can communicate news                                          | nebulous    |
| 2        | 23 important political information                                                                                                            | politics                                                             | needless    |
| 2        | 24 information diffusion chain                                                                                                                | chain of communication                                               | preposition |
| 2        | 25 different information sets                                                                                                                 | different sources                                                    | nebulous    |
| 2        | 26 from a cognitive processing perspective                                                                                                    | cognitively                                                          | needless    |
| 2        | 27 from a Bayesian learning standpoint                                                                                                        | with Bayesian learning                                               | needless    |
| 2        | 28 social political communication                                                                                                             | political discussion                                                 | needless    |
| 2        | 29 using a news story about the most recent GDP figures will reflect a relatively stable information environment for a three-month time frame | a news story about the latest GDP will stay current for three months | needless    |
| 2        | 30 individual news outlet Web sites                                                                                                           | news websites                                                        | needless    |
| 2        | 31 is an objectively neutral news source                                                                                                      | is neutral                                                           | needless    |
| 2        | 32 initially objective information sources                                                                                                    | original news                                                        | nebulous    |
| 2        | 33 common initial information source                                                                                                          | common source                                                        | needless    |
| 2        | 34 informational message (x11)                                                                                                                | message                                                              | needless    |
| 2        | 35 example socially transmitted messages                                                                                                      | examples of messages                                                 | preposition |
| 2        | 36 randomly assigned information treatment                                                                                                    | randomly assigned information                                        | needless    |
| 2        | 37 exact same informational treatment                                                                                                         | same message                                                         | needless    |
| 2        | 38 dependent variable measurement                                                                                                             | measures                                                             | needless    |
| 2        | 39 pre-treatment economic confidence score                                                                                                    | economic confidence before the treatment                             | piled       |
| 2        | 40 post-treatment economic confidence score                                                                                                   | economic confidence after the treatment                              | piled       |
| 2        | 41 positive economic evaluation change scores                                                                                                 | positive differences                                                 | piled       |
| 2        | 42 political discussion network literature                                                                                                    | literature on discussion networks                                    | piled       |
| 2        | 43 standard American government knowledge questions                                                                                           | standard questions about American government                         | piled       |
| 2        | 44 controlling for individual and informational-level control variables                                                                       | controlling variables for individuals and messages                   | piled       |
| 2        | 45 individuals overall were trying to be objective, reliable information shortcuts                                                            | participants tried to be objective                                   | nebulous    |
| 2        | 46 more negative evaluations                                                                                                                  | worse opinions                                                       | needless    |
| 2        | 47 more positive evaluations                                                                                                                  | better opinions                                                      | needless    |
| 2        | 48 subjective evaluations results                                                                                                             | participants' opinions                                               | nebulous    |
| 2        | 49 valid information alternative                                                                                                              | alternative                                                          | needless    |

| <b>Ref. No.</b> | <b>Original</b> | <b>Revised</b>                                                             | <b>Category</b>                                     |             |
|-----------------|-----------------|----------------------------------------------------------------------------|-----------------------------------------------------|-------------|
| 2               | 50              | novel research design                                                      | novel experiment                                    | needless    |
| 2               | 51              | this important theoretical work                                            | this theory                                         | needless    |
| 2               | 52              | controlled, incentivized lab experiments                                   | incentivized experiments                            | needless    |
| 2               | 53              | there is an empirical contribution in this paper by providing new evidence | this paper contributes new evidence                 | verb        |
| 2               | 54              | those who are more politically knowledgeable                               | those who know more about politics                  | verb        |
| 3               | 1               | economic outcomes (x14)                                                    | wealth                                              | nebulous    |
| 3               | 2               | state-society interactions                                                 | how the state interacts with society                | verb        |
| 3               | 3               | heterogeneous communities (x39)                                            | diverse communities                                 | nebulous    |
| 3               | 4               | homogeneous communities (x25)                                              | uniform communities                                 | nebulous    |
| 3               | 5               | third-party enforcement                                                    | regulation                                          | nebulous    |
| 3               | 6               | state capacity (x27)                                                       | state power                                         | nebulous    |
| 3               | 7               | facilitates the accumulation of state capacity (x3)                        | strengthens state institutions                      | nebulous    |
| 3               | 8               | common-interest states                                                     | benevolent states                                   | piled       |
| 3               | 9               | private economic activity (x22)                                            | trade                                               | nebulous    |
| 3               | 10              | homogeneous migrant communities (x5)                                       | uniform communities of migrants                     | preposition |
| 3               | 11              | heterogeneous migrant communities (x3)                                     | diverse communities of migrants                     | preposition |
| 3               | 12              | post-WWII population transfers                                             | people transferred after WWII                       | preposition |
| 3               | 13              | cultural heterogeneity (x15)                                               | diversity                                           | nebulous    |
| 3               | 14              | public goods provision (x16)                                               | provide public goods                                | verb        |
| 3               | 15              | weakens overall economic performance                                       | weakens the economy                                 | nebulous    |
| 3               | 16              | solve collective action problems                                           | cooperate                                           | nebulous    |
| 3               | 17              | weak social ties                                                           | weak relationships                                  | nebulous    |
| 3               | 18              | prevent the identification and punishment of uncooperative individuals     | prevent people from catching and punishing cheaters | verb        |
| 3               | 19              | potential third-party enforcer                                             | enforcer                                            | needless    |
| 3               | 20              | may contribute to the accumulation of state capacity                       | may strengthen the state                            | verb        |
| 3               | 21              | private economic behavior                                                  | trade                                               | nebulous    |
| 3               | 22              | facilitates the provision of market-supporting public goods                | helps support markets                               | verb        |
| 3               | 23              | arm's length transactions (x2)                                             | trade                                               | nebulous    |
| 3               | 24              | state-society relationship (x3)                                            | the state's relationship with society               | preposition |
| 3               | 25              | informal enforcement mechanisms (x5)                                       | informal enforcement                                | needless    |
| 3               | 26              | facilitate the provision of local public goods                             | help provide public goods                           | verb        |
| 3               | 27              | predictable and enforceable arm's length transactions                      | enforceable trade                                   | nebulous    |
| 3               | 28              | generates superior economic outcomes                                       | improves the economy                                | nebulous    |
| 3               | 29              | original micro-level dataset                                               | original dataset                                    | needless    |
| 3               | 30              | arbitrary resettlement procedures                                          | procedures for resettlement                         | preposition |
| 3               | 31              | shared informal norms                                                      | shared culture                                      | nebulous    |
| 3               | 32              | social organization and economic outcomes                                  | institutions and the economy                        | nebulous    |
| 3               | 33              | homogeneous migrant groups                                                 | uniform groups                                      | nebulous    |
| 3               | 34              | private-order organizations                                                | private organizations                               | needless    |
| 3               | 35              | for the provision of local public goods                                    | to provide public goods                             | verb        |
| 3               | 36              | diverse migrant groups                                                     | diverse groups                                      | needless    |
| 3               | 37              | higher entrepreneurship rates                                              | greater entrepreneurship                            | needless    |
| 3               | 38              | critical historical juncture in Poland's history                           | critical juncture in Poland's history               | needless    |

| <b>Ref. No.</b> | <b>Original</b> | <b>Revised</b>                                                                   | <b>Category</b>                                              |             |
|-----------------|-----------------|----------------------------------------------------------------------------------|--------------------------------------------------------------|-------------|
| 3               | 39              | culturally diverse populations                                                   | diverse populations                                          | needless    |
| 3               | 40              | group-specific characteristics                                                   | group characteristics                                        | needless    |
| 3               | 41              | differential state policies                                                      | state policies                                               | needless    |
| 3               | 42              | formerly German territories                                                      | territories                                                  | needless    |
| 3               | 43              | nonparametric modeling strategies                                                | nonparametric modeling                                       | needless    |
| 3               | 44              | potential unobserved confounds                                                   | potential confounds                                          | needless    |
| 3               | 45              | informal institutional alternatives                                              | informal institutions                                        | needless    |
| 3               | 46              | across different institutional settings                                          | with different institutions                                  | needless    |
| 3               | 47              | one-time snapshots                                                               | snapshots                                                    | needless    |
| 3               | 48              | developed market economies                                                       | developed economies                                          | needless    |
| 3               | 49              | growing empirical literature                                                     | growing literature                                           | needless    |
| 3               | 50              | post-WWII Europe                                                                 | Europe after WWII                                            | preposition |
| 3               | 51              | homogeneous settings (x3)                                                        | uniform communities                                          | nebulous    |
| 3               | 52              | widely shared reciprocity norms                                                  | shared rules of cooperation                                  | nebulous    |
| 3               | 53              | dense social ties                                                                | dense relationships                                          | nebulous    |
| 3               | 54              | greater voluntary provision of public goods                                      | cooperate to provide more public goods                       | verb        |
| 3               | 55              | higher levels of public goods provision                                          | more public goods                                            | needless    |
| 3               | 56              | state's bureaucratic apparatus                                                   | state's bureaucracy                                          | needless    |
| 3               | 57              | endogenous organizational solutions                                              | private solutions                                            | nebulous    |
| 3               | 58              | "self-help collective action"                                                    | regulating themselves                                        | nebulous    |
| 3               | 59              | substantial coordination costs                                                   | costs of discoordination                                     | preposition |
| 3               | 60              | sufficiently large population                                                    | enough people                                                | needless    |
| 3               | 61              | weak heterogeneous communities                                                   | diverse communities                                          | needless    |
| 3               | 62              | effective collective action mechanisms                                           | effective institutions for cooperation                       | preposition |
| 3               | 63              | endogenous (informal) enforcement                                                | informal enforcement                                         | needless    |
| 3               | 64              | exogenous (formal) enforcement                                                   | formal enforcement                                           | needless    |
| 3               | 65              | informal cooperation strategies                                                  | informal enforcement                                         | nebulous    |
| 3               | 66              | more frequent and encompassing state-society interactions                        | more interactions with the state                             | piled       |
| 3               | 67              | state-provided public goods                                                      | public goods provided by the state                           | piled       |
| 3               | 68              | community-provided public goods                                                  | public goods provided by the community                       | piled       |
| 3               | 69              | endogenous enforcement mechanisms                                                | informal enforcement                                         | nebulous    |
| 3               | 70              | informal enforcement strategies (x2)                                             | informal enforcement                                         | needless    |
| 3               | 71              | fiscal capacity (x12)                                                            | taxes                                                        | nebulous    |
| 3               | 72              | self-contained social units                                                      | self-contained                                               | needless    |
| 3               | 73              | legal private economic activity                                                  | legal trade                                                  | nebulous    |
| 3               | 74              | long-run social and economic development                                         | long-term development of the economy and society             | preposition |
| 3               | 75              | does not exert a persistently negative effect on social and economic development | does not persistently hinder social and economic development | verb        |
| 3               | 76              | voluntary public goods provision                                                 | providing public goods                                       | verb        |
| 3               | 77              | made greater investments in fiscal capacity                                      | collected more taxes                                         | nebulous    |
| 3               | 78              | shadow economic transactions                                                     | illegal trade                                                | nebulous    |
| 3               | 79              | for the protection of private property and enforcement of contracts              | to protect private property and enforce contracts            | verb        |
| 3               | 80              | can be endogenous to societal characteristics                                    | depends on the society                                       | nebulous    |
| 3               | 81              | heterogeneous settings                                                           | diverse communities                                          | nebulous    |
| 3               | 82              | the formation of linkages between the state and society                          | the development of the state                                 | nebulous    |

| <b>Ref. No.</b> | <b>Original</b> | <b>Revised</b>                                                                                                         | <b>Category</b>                                             |             |
|-----------------|-----------------|------------------------------------------------------------------------------------------------------------------------|-------------------------------------------------------------|-------------|
| 3               | 83              | the need to mitigate the adverse effects of social fragmentation in diverse populations                                | the need to resolve conflicts in diverse populations        | nebulous    |
| 3               | 84              | host countries' institutional environments                                                                             | country's institutions                                      | needless    |
| 3               | 85              | other nation-building tools                                                                                            | other institutions                                          | nebulous    |
| 3               | 86              | host-country institutions                                                                                              | institutions                                                | needless    |
| 3               | 87              | culturally heterogeneous settings                                                                                      | diverse societies                                           | nebulous    |
| 3               | 88              | where the impact of diversity on economic development has been especially negative                                     | where diversity has especially impeded economic development | verb        |
| 3               | 89              | heterogeneity undermines voluntary provision of public goods                                                           | diversity hinders cooperation                               | nebulous    |
| 3               | 90              | fail to uncover a similarly positive relationship between diversity and development                                    | find that diversity did not improve development             | verb        |
| 3               | 91              | segregated settings                                                                                                    | segregated communities                                      | nebulous    |
| 3               | 92              | integrated environment                                                                                                 | integrated community                                        | nebulous    |
| 4               | 1               | strong theoretical reasons to expect that                                                                              | theories that                                               | needless    |
| 4               | 2               | existing empirical studies                                                                                             | previous studies                                            | needless    |
| 4               | 3               | statistically significant effect                                                                                       | effect                                                      | needless    |
| 4               | 4               | inequality levels (x54)                                                                                                | inequality                                                  | needless    |
| 4               | 5               | extreme distributional outcomes (x3)                                                                                   | extreme distributions of wealth                             | nebulous    |
| 4               | 6               | extreme income distributions                                                                                           | income distributions                                        | needless    |
| 4               | 7               | instrumental variable regressions                                                                                      | instrumental variables                                      | needless    |
| 4               | 8               | direct fiscal redistribution (x12)                                                                                     | redistributing money directly                               | verb        |
| 4               | 9               | highly heterogeneous entities                                                                                          | very different                                              | nebulous    |
| 4               | 10              | historical income inequality data                                                                                      | historical data about income inequality                     | preposition |
| 4               | 11              | moderate income inequality levels                                                                                      | moderate inequality                                         | needless    |
| 4               | 12              | income distribution dynamics                                                                                           | changes in incomes                                          | preposition |
| 4               | 13              | more centrist outcomes                                                                                                 | moderate inequality                                         | nebulous    |
| 4               | 14              | newly enfranchised voters                                                                                              | voters                                                      | needless    |
| 4               | 15              | classic rational choice theories                                                                                       | theories of rational choice                                 | preposition |
| 4               | 16              | democratically determined fiscal policy                                                                                | fiscal policy in democracies                                | preposition |
| 4               | 17              | inequality-reducing policies                                                                                           | policies that reduce inequality                             | piled       |
| 4               | 18              | alternative, elite-competition perspective                                                                             | alternative theory of elite competition                     | preposition |
| 4               | 19              | more competitive, modern economic structures                                                                           | more competitive economies                                  | nebulous    |
| 4               | 20              | elite-competition view                                                                                                 | theory of elite competition                                 | preposition |
| 4               | 21              | to the extent that the literature theorizes that distributional issues drive democratization processes                 | if citizens seek democracy to redistribute wealth           | nebulous    |
| 4               | 22              | the logical expectation is that transitions to democratic governance should have profound impacts on inequality levels | adopting democracy should profoundly impact inequality      | nebulous    |
| 4               | 23              | middle ground results                                                                                                  | results                                                     | needless    |
| 4               | 24              | fixed-effects dynamic panel regression models (x2)                                                                     | regressions with dynamic panels and fixed effects           | preposition |
| 4               | 25              | no robust statistically significant relation                                                                           | no significant relation                                     | needless    |
| 4               | 26              | highly leader specific                                                                                                 | depend on the leader                                        | preposition |
| 4               | 27              | extremely high income inequality                                                                                       | extreme inequality                                          | needless    |
| 4               | 28              | different per capita income ranges                                                                                     | different ranges of income per capita                       | preposition |

| <b>Ref. No.</b> | <b>Original</b> | <b>Revised</b>                                                                                                                    | <b>Category</b>                                  |              |
|-----------------|-----------------|-----------------------------------------------------------------------------------------------------------------------------------|--------------------------------------------------|--------------|
| 4               | 29              | per capita income classifications                                                                                                 | income classifications                           | needless     |
| 4               | 30              | high- and low-inequality autocratic countries                                                                                     | autocracies with high and low inequality         | preposition  |
| 4               | 31              | robustly statistically significant determinant                                                                                    | significant determinant                          | needless     |
| 4               | 32              | income inequality dynamics                                                                                                        | how incomes change                               | nebulous     |
| 4               | 33              | in our baseline fixed-effects estimation                                                                                          | we estimate                                      | verb         |
| 4               | 34              | predemocracy Gini coefficient                                                                                                     | Gini coefficient before democracy                | preposition  |
| 4               | 35              | instrumental variable (IV) specifications                                                                                         | analyses with instrumental variables             | preposition  |
| 4               | 36              | very similar long-run effects                                                                                                     | similar effects                                  | needless     |
| 4               | 37              | two-stage least squares (2SLS) estimations                                                                                        | two-stage regressions                            | needless     |
| 4               | 38              | dynamic regional share of countries                                                                                               | proportion of nearby countries                   | nebulous     |
| 4               | 39              | instrumented conditional effect                                                                                                   | conditional effect                               | needless     |
| 4               | 40              | instrumental variable strategy                                                                                                    | instrumental variable                            | needless     |
| 4               | 41              | estimated long-run effects                                                                                                        | estimates                                        | needless     |
| 4               | 42              | low-inequality, formerly Communist group of countries                                                                             | formerly Communist countries with low inequality | preposition  |
| 4               | 43              | sensible sample restrictions                                                                                                      | sample restrictions                              | needless     |
| 4               | 44              | alternative democratization indicators                                                                                            | alternative indicators of democracy              | preposition  |
| 4               | 45              | more global mean reversion process                                                                                                | global reversion                                 | needless     |
| 4               | 46              | state's fiscal capacity                                                                                                           | state's taxes                                    | nebulous     |
| 4               | 47              | provision of pro-poor public goods                                                                                                | providing public goods to the poor               | verb         |
| 4               | 48              | middle ground effect (x4)                                                                                                         | tendency to the middle                           | nebulous     |
| 4               | 49              | median preference individuals                                                                                                     | individuals with median preferences              | preposition  |
| 4               | 50              | relatively more extreme policy outcomes                                                                                           | more extreme policies                            | needless     |
| 4               | 51              | degree of preference homogeneity                                                                                                  | shared interests                                 | nebulous     |
| 4               | 52              | standard probabilistic voting model                                                                                               | probabilistic voting model                       | needless     |
| 4               | 53              | public goods provision                                                                                                            | providing public goods                           | verb         |
| 4               | 54              | targeted public goods                                                                                                             | benefits                                         | needless     |
| 4               | 55              | extreme policy positions                                                                                                          | extreme policies                                 | needless     |
| 4               | 56              | yield (or protect) extreme distribution outcomes, from highly equal communistic regimes to highly unequal elite-dominated regimes | distribute wealth very equally or very unequally | nebulous     |
| 4               | 57              | should be heterogeneous according to (x2)                                                                                         | should depend on                                 | verb         |
| 4               | 58              | democratic political institution indicator                                                                                        | democracy indicator                              | needless     |
| 4               | 59              | written into democratic governance structures                                                                                     | written into law                                 | nebulous     |
| 4               | 60              | dynamic regional share of democracies                                                                                             | regional democracies                             | needless     |
| 4               | 61              | hypothesized 'Kuznets curve' relation                                                                                             | Kuznets curve                                    | needless     |
| 4               | 62              | SWIID (x12)                                                                                                                       | inequality database                              | abbreviation |
| 4               | 63              | multiple imputation (MI) regression tools                                                                                         | tools                                            | needless     |
| 4               | 64              | future inequality levels                                                                                                          | future inequality                                | needless     |
| 4               | 65              | time-invariant country characteristics                                                                                            | stable characteristics                           | needless     |
| 4               | 66              | fixed predemocracy inequality value                                                                                               | fixed variable for inequality before democracy   | preposition  |
| 4               | 67              | 90th percentile predemocracy inequality level                                                                                     | 90th percentile of inequality before democracy   | preposition  |
| 4               | 68              | heterogeneous outcomes and heterogeneous mechanisms                                                                               | different democracies by different means         | nebulous     |
| 4               | 69              | conditional income inequality dynamics                                                                                            | different effects on inequality                  | preposition  |
| 4               | 70              | autocratic political coalition                                                                                                    | autocratic coalition                             | needless     |

| <b>Ref. No.</b> | <b>Original</b> | <b>Revised</b>                                                                       | <b>Category</b>                                   |             |
|-----------------|-----------------|--------------------------------------------------------------------------------------|---------------------------------------------------|-------------|
| 4               | 71              | robustly statistically significant conditional effect                                | conditional effect                                | needless    |
| 4               | 72              | coalition-preferred policies                                                         | policies                                          | needless    |
| 4               | 73              | pre-transition inequality levels                                                     | inequality before the transition                  | preposition |
| 4               | 74              | initial, predemocracy inequality levels                                              | inequality before democracy                       | preposition |
| 4               | 75              | calculated predemocracy inequality level                                             | amount                                            | needless    |
| 4               | 76              | state capacity (x7)                                                                  | taxes                                             | nebulous    |
| 4               | 77              | different specific public policy outcomes                                            | different policies                                | needless    |
| 4               | 78              | more free-market policy environments                                                 | freer markets                                     | needless    |
| 4               | 79              | bottom or top decile income shares                                                   | the share of income in the bottom or top decile   | piled       |
| 4               | 80              | postdemocratization income inequality dynamics                                       | income inequality after democracy                 | piled       |
| 5               | 1               | large-scale administrative records (x3)                                              | administrative records                            | needless    |
| 5               | 2               | social science research (x4)                                                         | social science                                    | needless    |
| 5               | 3               | probabilistic record linkage (x10)                                                   | probabilistic matching                            | needless    |
| 5               | 4               | canonical model (x8)                                                                 | model                                             | needless    |
| 5               | 5               | post-merge analyses (x18)                                                            | analyses                                          | needless    |
| 5               | 6               | comprehensive simulation studies (x2)                                                | simulations                                       | needless    |
| 5               | 7               | campaign contribution records                                                        | campaign contributions                            | needless    |
| 5               | 8               | nationwide voter files (x18)                                                         | voter files                                       | needless    |
| 5               | 9               | open-source software package                                                         | open-source software                              | needless    |
| 5               | 10              | available data sets                                                                  | data                                              | needless    |
| 5               | 11              | cutting-edge empirical research                                                      | research                                          | needless    |
| 5               | 12              | deterministic merge methods                                                          | deterministic methods                             | needless    |
| 5               | 13              | well-known statistics literature                                                     | statistics literature                             | needless    |
| 5               | 14              | current open-source implementation                                                   | current methods                                   | nebulous    |
| 5               | 15              | today's social science research                                                      | social science                                    | needless    |
| 5               | 16              | canonical probabilistic record linkage model                                         | probabilistic matching                            | piled       |
| 5               | 17              | previous methodological literature                                                   | previous literature                               | needless    |
| 5               | 18              | population name frequency                                                            | name frequency                                    | needless    |
| 5               | 19              | conduct post-merge analyses                                                          | analyze merged data                               | verb        |
| 5               | 20              | missing data proportion                                                              | proportion of missing data                        | preposition |
| 5               | 21              | recently proposed probabilistic approaches                                           | previous algorithms                               | needless    |
| 5               | 22              | state-of-art methods                                                                 | methods                                           | needless    |
| 5               | 23              | campaign contribution database                                                       | database of campaign contributions                | preposition |
| 5               | 24              | partisan residential segregation                                                     | residential segregation of partisans              | preposition |
| 5               | 25              | political analytics professionals                                                    | political analysts                                | needless    |
| 5               | 26              | effective microtargeting strategies                                                  | effective microtargeting                          | needless    |
| 5               | 27              | available within-state and across-state migration rates                              | rates of migration within and across states       | preposition |
| 5               | 28              | we first conduct a within-state merge for each state followed by across-state merges | we merge within each state and then across states | verb        |
| 5               | 29              | exact matching method                                                                | exact matching                                    | needless    |
| 5               | 30              | across-state movers                                                                  | movers across states                              | preposition |
| 5               | 31              | existing matching method                                                             | previous algorithms                               | needless    |
| 5               | 32              | open-source R software package fastlink                                              | open-source R program called fastlink             | needless    |
| 5               | 33              | inform parameter estimation                                                          | estimate parameters                               | verb        |
| 5               | 34              | the incorporation of uncertainty                                                     | incorporating uncertainty                         | verb        |

| <b>Ref. No.</b> | <b>Original</b> | <b>Revised</b>                                                                                                | <b>Category</b>                                                      |             |
|-----------------|-----------------|---------------------------------------------------------------------------------------------------------------|----------------------------------------------------------------------|-------------|
| 5               | 35              | simple finite mixture structure                                                                               | finite mixture                                                       | needless    |
| 5               | 36              | corresponding heteroskedasticity-robust standard errors                                                       | robust standard errors                                               | needless    |
| 5               | 37              | today's cutting-edge quantitative social science research                                                     | modern social science                                                | piled       |
| 5               | 38              | false positive and false negative rates                                                                       | false positives and false negatives                                  | piled       |
| 5               | 39              | the proposed record linkage technology                                                                        | this algorithm                                                       | needless    |
| 6               | 1               | taste-based discrimination (x5)                                                                               | discrimination                                                       | needless    |
| 6               | 2               | discriminated minority groups (x2)                                                                            | immigrants                                                           | nebulous    |
| 6               | 3               | to empirically identify                                                                                       | to examine                                                           | needless    |
| 6               | 4               | increased native hostility                                                                                    | increased hostility from natives                                     | preposition |
| 6               | 5               | assimilation investments                                                                                      | efforts to assimilate                                                | nebulous    |
| 6               | 6               | has been identified as one of the key impediments to                                                          | impedes                                                              | verb        |
| 6               | 7               | economic and social integration                                                                               | integration                                                          | needless    |
| 6               | 8               | less research has been devoted to understanding                                                               | less research has studied                                            | needless    |
| 6               | 9               | this is a question of both theoretical interest and policy relevance                                          | this question bears on theory and policy                             | needless    |
| 6               | 10              | undertaking explicit oppositional actions                                                                     | retaliating                                                          | nebulous    |
| 6               | 11              | minorities' self-reported attitudes                                                                           | minorities' attitudes                                                | needless    |
| 6               | 12              | self-reported experiences                                                                                     | experiences                                                          | needless    |
| 6               | 13              | minority group's characteristics                                                                              | minorities' characteristics                                          | needless    |
| 6               | 14              | pre-existing assimilation trends                                                                              | previous efforts to assimilate                                       | nebulous    |
| 6               | 15              | less-integrated minority members                                                                              | less integrated immigrants                                           | nebulous    |
| 6               | 16              | studies have relied on laboratory manipulations in perceptions                                                | previous studies manipulated perceptions                             | verb        |
| 6               | 17              | immigrants' own best efforts                                                                                  | immigrants' efforts                                                  | needless    |
| 6               | 18              | to identify the causal effect of societal discrimination on the integration decisions of immigrant minorities | to see how discrimination affects immigrants' decisions to integrate | verb        |
| 6               | 19              | large and fairly well-integrated group                                                                        | were numerous and integrated                                         | piled       |
| 6               | 20              | in the post-war period                                                                                        | after the war                                                        | preposition |
| 6               | 21              | pre-war average                                                                                               | average before the war                                               | preposition |
| 6               | 22              | anti-German sentiment (x8)                                                                                    | hostility against Germans                                            | preposition |
| 6               | 23              | anti-German propaganda                                                                                        | propaganda against Germans                                           | preposition |
| 6               | 24              | anti-German hostility (x3)                                                                                    | hostility against Germans                                            | preposition |
| 6               | 25              | democratic vote shares                                                                                        | votes for democrats                                                  | preposition |
| 6               | 26              | hostile native attitudes                                                                                      | native hostility                                                     | needless    |
| 6               | 27              | previous assimilation patterns                                                                                | previous assimilation                                                | nebulous    |
| 6               | 28              | observed assimilation outcomes                                                                                | outcomes of assimilation                                             | preposition |
| 6               | 29              | minority assimilation decisions                                                                               | decisions to assimilate                                              | preposition |
| 6               | 30              | labor market outcomes (x3)                                                                                    | employment                                                           | nebulous    |
| 6               | 31              | social and economic settings                                                                                  | society                                                              | nebulous    |
| 6               | 32              | formal political participation (x3)                                                                           | political participation                                              | needless    |
| 6               | 33              | social and political integration                                                                              | integration                                                          | needless    |
| 6               | 34              | in a politically charged environment                                                                          | during political conflicts                                           | nebulous    |
| 6               | 35              | shows in a causally identified way how discrimination can impact                                              | shows how discrimination impacts                                     | needless    |

| <b>Ref. No.</b> | <b>Original</b> | <b>Revised</b>                                                                                                   | <b>Category</b>                                                  |             |
|-----------------|-----------------|------------------------------------------------------------------------------------------------------------------|------------------------------------------------------------------|-------------|
| 6               | 36              | female labor force participation                                                                                 | women's employment                                               | piled       |
| 6               | 37              | temporally exogenous increase                                                                                    | independent increase                                             | nebulous    |
| 6               | 38              | minority assimilation patterns                                                                                   | assimilation                                                     | needless    |
| 6               | 39              | purely rational motivations                                                                                      | rational motivations                                             | needless    |
| 6               | 40              | the direction of the response is shown to depend on                                                              | the choice depends on                                            | needless    |
| 6               | 41              | these self-reported identity measures                                                                            | these measures                                                   | needless    |
| 6               | 42              | could also be interpreted as a measure of                                                                        | can also measure                                                 | verb        |
| 6               | 43              | to identify the causal effect of discrimination on assimilation                                                  | to test how discrimination affects assimilation                  | needless    |
| 6               | 44              | formal discriminatory treatment                                                                                  | discrimination by institutions                                   | preposition |
| 6               | 45              | preference-based model of discrimination                                                                         | preference for discrimination                                    | needless    |
| 6               | 46              | taste-based factors                                                                                              | preferences                                                      | nebulous    |
| 6               | 47              | rational screening strategy                                                                                      | screening strategy                                               | needless    |
| 6               | 48              | taste-based discrimination mechanism                                                                             | preferences for discrimination                                   | nebulous    |
| 6               | 49              | target group's detection technology                                                                              | group's ability to detect mimics                                 | piled       |
| 6               | 50              | Germans' lower physical and cultural distance                                                                    | Germans' similarity in appearance and culture                    | preposition |
| 6               | 51              | group-level discrimination                                                                                       | group discrimination                                             | needless    |
| 6               | 52              | group-level characteristics                                                                                      | group characteristics                                            | needless    |
| 6               | 53              | minority group identification                                                                                    | identification with the minority                                 | preposition |
| 6               | 54              | self-reported perceptions                                                                                        | perceptions                                                      | needless    |
| 6               | 55              | group-level targeting                                                                                            | group prejudice                                                  | needless    |
| 6               | 56              | costly assimilation actions                                                                                      | costly efforts to assimilate                                     | preposition |
| 6               | 57              | parents may adopt external behaviors that are compatible with an authority's moral demands                       | parents may comply with an authority's demands                   | nebulous    |
| 6               | 58              | assimilation in terms of observable characteristics                                                              | assimilation in appearances                                      | needless    |
| 6               | 59              | German language bans                                                                                             | bans against German language                                     | preposition |
| 6               | 60              | private parental and community efforts                                                                           | parents and communities made more effort                         | piled       |
| 6               | 61              | characteristic minority names                                                                                    | minority names                                                   | needless    |
| 6               | 62              | purely formal responses to increased incentives to hide                                                          | facades to hide                                                  | needless    |
| 7               | 1               | there exists almost no causal evidence regarding the impact of the refugee crisis on natives' attitudes          | we do not know how the refugee crisis impacts natives' attitudes | verb        |
| 7               | 2               | where Greek islands close to the Turkish coast experienced a sudden and massive increase in refugee arrivals     | where Greek islands suddenly received multitudes of refugees     | verb        |
| 7               | 3               | direct exposure to refugee arrivals induces sizeable and lasting increases in natives' hostility toward refugees | natives who encounter refugees feel more hostile toward them     | verb        |
| 7               | 4               | both standard economic and cultural explanations                                                                 | economic and cultural explanations                               | needless    |
| 7               | 5               | anti-immigrant sentiment / attitudes / preferences / policy preferences (x16)                                    | hostility against immigrants                                     | preposition |



| <b>Ref. No.</b> | <b>Original</b>                                                                                     | <b>Revised</b>                                             | <b>Category</b> |
|-----------------|-----------------------------------------------------------------------------------------------------|------------------------------------------------------------|-----------------|
| 7 6             | recent years have seen the highest levels of forced displacement                                    | in recent years, the most people were forcefully displaced | verb            |
| 7 7             | violent political backlash                                                                          | violence                                                   | needless        |
| 7 8             | more restrictive asylum policies                                                                    | policies to restrict asylum                                | preposition     |
| 7 9             | refugee migration is an important factor fueling the rise                                           | refugee migration fuels the rise                           | verb            |
| 7 10            | aggregate vote shares                                                                               | votes                                                      | needless        |
| 7 11            | this lacuna is problematic for our theoretical understanding of                                     | we do not understand                                       | verb            |
| 7 12            | Europe's political landscape                                                                        | European politics                                          | needless        |
| 7 13            | the mechanism under which contact with refugees alleviates or catalyzes concerns                    | how contact with refugees affects people                   | nebulous        |
| 7 14            | the impact of refugee migration on natives' attitudes                                               | how refugees impact natives' attitudes                     | verb            |
| 7 15            | readily available aggregate data on voting behavior                                                 | voting data                                                | needless        |
| 7 16            | individual-level outcome measures                                                                   | measures of individuals                                    | preposition     |
| 7 17            | the migrant's decision-making process that determines                                               | how migrants decide                                        | verb            |
| 7 18            | forcefully displaced people                                                                         | people forced to leave                                     | verb            |
| 7 19            | within the financial and legal constraints that asylum seekers face                                 | given what's affordable and legal                          | nebulous        |
| 7 20            | exclusionary attitudes                                                                              | hostility                                                  | nebulous        |
| 7 21            | true causal effect                                                                                  | true effect                                                | needless        |
| 7 22            | the impact of the refugee crisis on their attitudes toward refugees                                 | how the refugee crisis impacts their attitudes             | verb            |
| 7 23            | EU external border                                                                                  | EU border                                                  | needless        |
| 7 24            | many difficult-to-patrol islands                                                                    | many islands that are difficult to patrol                  | piled           |
| 7 25            | very short time window                                                                              | short time                                                 | needless        |
| 7 26            | these boat arrivals not only took place in a short time window                                      | these boats arrived in a short time                        | verb            |
| 7 27            | aforementioned selection issue                                                                      | selection issue                                            | needless        |
| 7 28            | ignoring the endogenous part that is driven by preexisting differences in attitudes toward refugees | ignoring refugees' preferences for friendlier islands      | nebulous        |
| 7 29            | many observable and unobservable characteristics                                                    | many characteristics                                       | needless        |
| 7 30            | within-island variation                                                                             | variation within islands                                   | preposition     |
| 7 31            | UNHCR (x10)                                                                                         | UN Refugee Agency                                          | abbreviation    |
| 7 32            | complementary mechanism test                                                                        | another test                                               | nebulous        |
| 7 33            | has statistically and politically meaningful effects on                                             | affects                                                    | verb            |
| 7 34            | natives' exclusionary attitudes                                                                     | natives' hostility                                         | nebulous        |
| 7 35            | 1/4 standard deviation (SD) increase                                                                | increase of 1/4 standard deviation                         | preposition     |
| 7 36            | anti-asylum seeker and anti-immigrant attitudes                                                     | hostility toward asylum seekers and immigrants             | preposition     |
| 7 37            | anti-Muslim attitudes                                                                               | hostility toward Muslims                                   | preposition     |
| 7 38            | usual materialist concerns                                                                          | fear of economic competition                               | nebulous        |
| 7 39            | ideational concerns                                                                                 | fear of different cultures                                 | nebulous        |
| 7 40            | exclusionary reactions (x7)                                                                         | exclusion                                                  | needless        |

| <b>Ref. No.</b> | <b>Original</b> | <b>Revised</b>                                                                                                 | <b>Category</b>                                                |             |
|-----------------|-----------------|----------------------------------------------------------------------------------------------------------------|----------------------------------------------------------------|-------------|
| 7               | 41              | instrumental variable approach                                                                                 | instrumental variable                                          | needless    |
| 7               | 42              | acquiescence response bias                                                                                     | tendency to agree                                              | nebulous    |
| 7               | 43              | quasi-behavioral outcomes (x3)                                                                                 | measures of participation                                      | nebulous    |
| 7               | 44              | real-life consequences                                                                                         | consequences                                                   | needless    |
| 7               | 45              | anti-asylum seeker policy preferences and attitudes                                                            | opposition to asylum seekers                                   | preposition |
| 7               | 46              | more general anti-immigrant policy preferences and attitudes                                                   | general opposition to immigrants                               | nebulous    |
| 7               | 47              | the third set of outcomes provides quasi-behavioral measures of respondents' willingness to politically engage | the third set measures participants' motivation to participate | needless    |
| 7               | 48              | general anti-Muslim policy preferences and attitudes                                                           | general opposition to Muslims                                  | piled       |
| 7               | 49              | anti-refugee political engagement                                                                              | political engagement against refugees                          | preposition |
| 7               | 50              | continuous arrival measure                                                                                     | continuous measure of arrival                                  | preposition |
| 7               | 51              | at both extensive and intensive margins                                                                        | proportionally                                                 | nebulous    |
| 7               | 52              | complementary within-island analyses                                                                           | analyses within islands                                        | preposition |
| 7               | 53              | several Northern African transit countries                                                                     | transit countries in Northern Africa                           | preposition |
| 7               | 54              | we believe that our findings have important implications for our theoretical understanding of                  | our findings help understand                                   | verb        |
| 7               | 55              | anti-refugee and anti-immigrant preferences                                                                    | hostility toward refugees and immigrants                       | preposition |
| 7               | 56              | an exacerbated reaction to a contemporaneous trigger                                                           | a momentary overreaction                                       | needless    |
| 7               | 57              | initial negative reactions                                                                                     | initial prejudice                                              | nebulous    |
| 7               | 58              | hostile spillover effect                                                                                       | hostile spillover                                              | needless    |
| 7               | 59              | is concerning from a normative perspective                                                                     | is concerning                                                  | needless    |
| 8               | 1               | local economic conditions (x41)                                                                                | local economy                                                  | needless    |
| 8               | 2               | varies by citizens' interactions with it                                                                       | depends on how citizens interact with it                       | verb        |
| 8               | 3               | more recent and frequent encounters                                                                            | when citizens encounter                                        | verb        |
| 8               | 4               | feature more prominently in evaluations                                                                        | influence how citizens evaluate                                | verb        |
| 8               | 5               | "context priming"                                                                                              | observation                                                    | nebulous    |
| 8               | 6               | granularly detailed data                                                                                       | detailed data                                                  | needless    |
| 8               | 7               | precinct-level election returns                                                                                | election results by precinct                                   | preposition |
| 8               | 8               | individual-level panel survey                                                                                  | panel survey                                                   | needless    |
| 8               | 9               | provides a framework for understanding                                                                         | helps understand                                               | needless    |
| 8               | 10              | retrospective evaluations of the state of the economy shape voters' decisions                                  | voters evaluate the economy when judging politicians           | verb        |
| 8               | 11              | this is desirable from the perspective of democratic accountability                                            | this makes politicians accountable                             | nebulous    |
| 8               | 12              | the performance of incumbent politicians                                                                       | how the incumbent performed                                    | verb        |
| 8               | 13              | to further our understanding of                                                                                | to understand                                                  | verb        |
| 8               | 14              | retrospective economic voting (x2)                                                                             | retrospective voting                                           | needless    |
| 8               | 15              | government's economic performance                                                                              | how the government performed                                   | verb        |
| 8               | 16              | neutral economic information                                                                                   | neutral assessments of the economy                             | nebulous    |
| 8               | 17              | recently emerged strand of research                                                                            | recent research                                                | needless    |
| 8               | 18              | local residential context (x2)                                                                                 | neighborhood                                                   | nebulous    |
| 8               | 19              | abstract national economic aggregates                                                                          | indicators of the national economy                             | nebulous    |

| <b>Ref. No.</b> | <b>Original</b> | <b>Revised</b>                                                                   | <b>Category</b>                                         |
|-----------------|-----------------|----------------------------------------------------------------------------------|---------------------------------------------------------|
| 8               | 20              | mass-mediated—and politically disputed—<br>information                           | mass media<br>needless                                  |
| 8               | 21              | various direct and more subtle cues                                              | looking<br>needless                                     |
| 8               | 22              | residential setting                                                              | neighborhood<br>nebulous                                |
| 8               | 23              | relatively unbiased signal                                                       | evidence<br>nebulous                                    |
| 8               | 24              | local economic voting (x32)                                                      | voting based on the local economy<br>piled              |
| 8               | 25              | county-level unemployment rates                                                  | unemployment in counties<br>preposition                 |
| 8               | 26              | concrete everyday exposure                                                       | everyday experience<br>nebulous                         |
| 8               | 27              | different social phenomena                                                       | phenomena<br>needless                                   |
| 8               | 28              | immediate residential context                                                    | neighborhood<br>nebulous                                |
| 8               | 29              | local context effects                                                            | experience<br>nebulous                                  |
| 8               | 30              | news media coverage                                                              | news media<br>needless                                  |
| 8               | 31              | across-the-board effects                                                         | effects<br>needless                                     |
| 8               | 32              | aggregate contextual units (x3)                                                  | aggregates<br>needless                                  |
| 8               | 33              | wider context literature                                                         | literature<br>needless                                  |
| 8               | 34              | voters' limited attention span                                                   | limited attention<br>needless                           |
| 8               | 35              | other politically relevant considerations                                        | other considerations<br>needless                        |
| 8               | 36              | important theoretical addition                                                   | important<br>needless                                   |
| 8               | 37              | comprehensive and highly granular registry<br>data                               | registry data<br>needless                               |
| 8               | 38              | context priming hypothesis                                                       | priming hypothesis<br>needless                          |
| 8               | 39              | local housing market activity                                                    | local housing market<br>needless                        |
| 8               | 40              | incumbent government support                                                     | support for the incumbent<br>preposition                |
| 8               | 41              | two complementary empirical approaches                                           | two methods<br>nebulous                                 |
| 8               | 42              | at the precinct level (x2)                                                       | in precincts<br>needless                                |
| 8               | 43              | precinct level data (x13)                                                        | precinct data<br>needless                               |
| 8               | 44              | to test the hypothesized causal relationship                                     | to test causality<br>needless                           |
| 8               | 45              | individual voters' local contexts                                                | voters' neighborhoods<br>nebulous                       |
| 8               | 46              | two-period panel survey                                                          | panel survey with two periods<br>preposition            |
| 8               | 47              | survey respondents' local housing markets                                        | local housing markets<br>needless                       |
| 8               | 48              | hypothesized positive relationship                                               | hypothesized link<br>needless                           |
| 8               | 49              | 50% year-on-year increase                                                        | 50% increase each year<br>piled                         |
| 8               | 50              | pre-crisis housing boom                                                          | housing boom before the crisis<br>preposition           |
| 8               | 51              | one to two percentage point increase                                             | increase of one to two percentage points<br>preposition |
| 8               | 52              | observed local economic voting                                                   | this economic voting<br>needless                        |
| 8               | 53              | egotropic pocketbook concerns                                                    | personal finances<br>nebulous                           |
| 8               | 54              | incumbents' economic stewardship                                                 | incumbents' performance<br>nebulous                     |
| 8               | 55              | rarely examined, yet, in our opinion, highly<br>relevant local economic quantity | key quantity from the local economy<br>piled            |
| 8               | 56              | local economic conditions hypothesis (x9)                                        | local economy hypothesis<br>needless                    |
| 8               | 57              | time-invariant structural differences                                            | stable differences<br>needless                          |
| 8               | 58              | within-precinct/within-individual variation                                      | variation within precincts and individuals<br>piled     |
| 8               | 59              | individual-level housing price change variable                                   | change in house prices<br>piled                         |
| 8               | 60              | zip-code-level unemployment rate                                                 | unemployment rate by zip code<br>preposition            |
| 8               | 61              | zip code area economic activity                                                  | zip codes with economies<br>piled                       |
| 8               | 62              | global housing market surge                                                      | global surge in the housing market<br>preposition       |
| 9               | 1               | street-level drug markets                                                        | drug markets on the street<br>preposition               |
| 9               | 2               | PCC (x188)                                                                       | gang<br>abbreviation                                    |
| 9               | 3               | seized PCC documents                                                             | seized documents<br>needless                            |

| <b>Ref. No.</b> | <b>Original</b>                                      | <b>Revised</b>                                 | <b>Category</b> |
|-----------------|------------------------------------------------------|------------------------------------------------|-----------------|
| 9 4             | internal disciplinary system (x6)                    | disciplinary system                            | needless        |
| 9 5             | vast, consignment-based trafficking operations       | trafficks vast amounts of drugs by consignment | verb            |
| 9 6             | elaborate bureaucratic procedures and recordkeeping  | elaborate bureaucracy and records              | needless        |
| 9 7             | overwhelmingly nonviolent punishments                | nonviolent punishments                         | needless        |
| 9 8             | rational-bureaucratic legitimacy                     | legitimacy                                     | needless        |
| 9 9             | meticulous "criminal criminal records"               | meticulous records                             | needless        |
| 9 10            | facilitate community stigmatization of infractors    | stigmatize infractors                          | verb            |
| 9 11            | widespread voluntary compliance (x3)                 | compliance                                     | needless        |
| 9 12            | formal state power                                   | state power                                    | needless        |
| 9 13            | organizations' core members                          | members                                        | needless        |
| 9 14            | drug-trafficking organizations (DTOs)                | drug gangs                                     | abbreviation    |
| 9 15            | prison-based criminal governance (x2)                | how leaders govern gangs from prison           | verb            |
| 9 16            | large urban populations                              | cities                                         | needless        |
| 9 17            | informally urbanized peripheries                     | places                                         | nebulous        |
| 9 18            | statewide homicide rates                             | homicides                                      | needless        |
| 9 19            | PCC's street-level drug business                     | gang's drug business                           | piled           |
| 9 20            | PCC's overarching approach to governance             | how the gang governs                           | verb            |
| 9 21            | along Weberian, rational-bureaucratic lines          | based on rules                                 | nebulous        |
| 9 22            | decentralized, credit-based drug business            | drug business                                  | needless        |
| 9 23            | endemic agency problems                              | potential mistrust                             | nebulous        |
| 9 24            | intense militarized policing                         | militarized policing                           | needless        |
| 9 25            | recently released members                            | released members                               | needless        |
| 9 26            | substantively and theoretically puzzling findings    | puzzling findings                              | needless        |
| 9 27            | hierarchical franchise structure                     | hierarchy                                      | needless        |
| 9 28            | older prison-gang-cum-drug-cartel                    | cartel                                         | needless        |
| 9 29            | decentralized, competitive network                   | network                                        | needless        |
| 9 30            | paying off bulk drug purchases                       | paying for drugs                               | needless        |
| 9 31            | elaborate transportation network                     | transportation                                 | needless        |
| 9 32            | other member welfare benefits                        | other benefits for members                     | preposition     |
| 9 33            | "criminal criminal records" (x13)                    | records                                        | needless        |
| 9 34            | PCC's consignment model                              | gang's consignments                            | needless        |
| 9 35            | procedurally fair and meticulously documented system | fair procedures and meticulous documentation   | nebulous        |
| 9 36            | incentivizing timely debt repayment                  | motivating them to repay debts on time         | verb            |
| 9 37            | legitimate, rational-bureaucratic authority          | law                                            | nebulous        |
| 9 38            | adverse-selection problem                            | problem of trust                               | nebulous        |
| 9 39            | official criminal justice system                     | state courts                                   | needless        |
| 9 40            | punished members' actual performance                 | trustworthiness                                | needless        |
| 9 41            | "criminal criminal justice" (x4)                     | gang's justice                                 | needless        |
| 9 42            | PCC's elaborate, standardized procedures             | gang's rules                                   | needless        |
| 9 43            | overdue consignment debts                            | overdue debts                                  | needless        |
| 9 44            | escalating "three strikes" rule                      | escalating punishments for three strikes       | preposition     |
| 9 45            | lengthy and potentially risky semi-public trials     | lengthy trials                                 | needless        |
| 9 46            | PCC's meticulous recordkeeping                       | meticulous records                             | needless        |
| 9 47            | several theorized mechanisms                         | several theories                               | needless        |

| <b>Ref. No.</b> | <b>Original</b> | <b>Revised</b>                                                                                                                                                           | <b>Category</b>                                                                                               |             |
|-----------------|-----------------|--------------------------------------------------------------------------------------------------------------------------------------------------------------------------|---------------------------------------------------------------------------------------------------------------|-------------|
| 9               | 48              | accurate, centralized recordkeeping                                                                                                                                      | accurate records                                                                                              | needless    |
| 9               | 49              | São Paulo's urban periphery                                                                                                                                              | São Paulo's periphery                                                                                         | needless    |
| 9               | 50              | trustworthy, efficient, "Weberian" governance                                                                                                                            | orderly governance                                                                                            | needless    |
| 9               | 51              | state coercive apparatus                                                                                                                                                 | state justice                                                                                                 | nebulous    |
| 9               | 52              | state's own mass-incarceration policies                                                                                                                                  | state's prisons                                                                                               | needless    |
| 9               | 53              | vast, impoverished urban periphery                                                                                                                                       | poor peripheries of cities                                                                                    | preposition |
| 9               | 54              | establish street-level governance                                                                                                                                        | govern the streets                                                                                            | verb        |
| 9               | 55              | PCC's rational-bureaucratic structure                                                                                                                                    | gang's rules                                                                                                  | nebulous    |
| 9               | 56              | more charismatic, territorial, and violent approaches                                                                                                                    | more violent gangs                                                                                            | needless    |
| 9               | 57              | novel and potentially transformative model                                                                                                                               | innovation                                                                                                    | needless    |
| 9               | 58              | related ethical and methodological issues                                                                                                                                | ethics and methods                                                                                            | needless    |
| 9               | 59              | PCC's legitimacy-based approach                                                                                                                                          | gang's code                                                                                                   | nebulous    |
| 9               | 60              | four central empirical findings                                                                                                                                          | four findings                                                                                                 | needless    |
| 9               | 61              | PCC's consignment-based drug trafficking business, its relatively mild and "sympathetic" punishment regime, and resource-intensive recordkeeping, and its use of profits | the gang trafficks drugs by consignment, punishes misconduct mildly, keeps detailed records, and uses profits | verb        |
| 9               | 62              | flexible, decentralized expansion                                                                                                                                        | expansion                                                                                                     | needless    |
| 9               | 63              | individual street dealers                                                                                                                                                | dealers                                                                                                       | needless    |
| 10              | 1               | firm-level field experiment                                                                                                                                              | field experiment on firms                                                                                     | preposition |
| 10              | 2               | single-party-ruled Vietnam                                                                                                                                               | Vietnam                                                                                                       | needless    |
| 10              | 3               | broad-based representative sample                                                                                                                                        | representative sample                                                                                         | needless    |
| 10              | 4               | three main outcomes of this treatment                                                                                                                                    | three effects of comments                                                                                     | nebulous    |
| 10              | 5               | firms exhibited greater improvement in their views                                                                                                                       | firms improved their views                                                                                    | verb        |
| 10              | 6               | government's regulatory authority (x3)                                                                                                                                   | government regulations                                                                                        | needless    |
| 10              | 7               | government-affiliated auditors                                                                                                                                           | auditors                                                                                                      | needless    |
| 10              | 8               | state-owned firm's storage procedures                                                                                                                                    | firm's procedures                                                                                             | needless    |
| 10              | 9               | in even more extreme and deadly fashion                                                                                                                                  | with even more deaths                                                                                         | needless    |
| 10              | 10              | the April 24, 2013, collapse                                                                                                                                             | the collapse on April 24, 2013                                                                                | preposition |
| 10              | 11              | structural safety standards                                                                                                                                              | safety standards                                                                                              | needless    |
| 10              | 12              | tragic industrial accidents                                                                                                                                              | tragic accidents                                                                                              | needless    |
| 10              | 13              | are obstacles to effective enforcement                                                                                                                                   | block enforcement                                                                                             | verb        |
| 10              | 14              | government's regulatory legitimacy                                                                                                                                       | the legitimacy of regulations                                                                                 | preposition |
| 10              | 15              | induce voluntary compliance                                                                                                                                              | encourage firms to comply                                                                                     | verb        |
| 10              | 16              | extensive theoretical work                                                                                                                                               | theories                                                                                                      | needless    |
| 10              | 17              | political science's deliberative democracy tradition                                                                                                                     | deliberative democracy                                                                                        | needless    |
| 10              | 18              | psychology's procedural justice literature                                                                                                                               | procedural justice                                                                                            | needless    |
| 10              | 19              | personal involvement in the rule-making process                                                                                                                          | contributing to making the rules                                                                              | verb        |
| 10              | 20              | the individual level (x2)                                                                                                                                                | individuals                                                                                                   | needless    |
| 10              | 21              | within the context of an initiative                                                                                                                                      | within an initiative                                                                                          | needless    |
| 10              | 22              | authoritarian and nominally communist Vietnam                                                                                                                            | Vietnam                                                                                                       | needless    |
| 10              | 23              | two-year randomized control trial                                                                                                                                        | two-year experiment                                                                                           | needless    |
| 10              | 24              | pilot consultation program                                                                                                                                               | consultation program                                                                                          | needless    |

| <b>Ref. No.</b> | <b>Original</b>                                                                             | <b>Revised</b>                                  | <b>Category</b> |
|-----------------|---------------------------------------------------------------------------------------------|-------------------------------------------------|-----------------|
| 10 25           | reforming, but still government-affiliated, Vietnam Chamber of Commerce and Industry (VCCI) | Vietnam Chamber of Commerce and Industry        | needless        |
| 10 26           | VCCI (x24)                                                                                  | the chamber                                     | abbreviation    |
| 10 27           | broad range of empirical challenges                                                         | challenges                                      | needless        |
| 10 28           | regulatory compliance (x10)                                                                 | compliance                                      | needless        |
| 10 29           | draft labor regulation                                                                      | draft of regulations                            | preposition     |
| 10 30           | regulatory design process (x10)                                                             | designing regulations                           | verb            |
| 10 31           | by exposing firms to more information about the regulation                                  | because firms learn more about the regulation   | nebulous        |
| 10 32           | substantive change mechanism (x14)                                                          | changing policy                                 | verb            |
| 10 33           | by altering the actual constraints imposed by the regulation                                | by altering the regulation                      | needless        |
| 10 34           | it is critically important to distinguish                                                   | we distinguish                                  | needless        |
| 10 35           | legitimacy, information, and substantive change mechanisms                                  | legitimacy, learning, and policy change         | needless        |
| 10 36           | logical alternative path                                                                    | path                                            | needless        |
| 10 37           | can potentially increase the likelihood of                                                  | can increase                                    | needless        |
| 10 38           | each also has vastly different implications for how we understand                           | each implies different ways to understand       | verb            |
| 10 39           | for the design of potential solutions to regulatory noncompliance                           | design rules to improve compliance              | verb            |
| 10 40           | leading to bias in our average treatment effects                                            | biasing the effects                             | verb            |
| 10 41           | our study design involved random assignment of sampled firms                                | we randomly assigned firms                      | verb            |
| 10 42           | main participation treatment group                                                          | participation treatment                         | needless        |
| 10 43           | newly drafted labor regulation                                                              | draft of regulations                            | preposition     |
| 10 44           | legitimacy and information mechanisms                                                       | legitimacy and learning                         | needless        |
| 10 45           | broader VCCI efforts                                                                        | the chamber's efforts                           | abbreviation    |
| 10 46           | facilitate communication between government and the business community                      | help the government communicate with businesses | verb            |
| 10 47           | targeted draft labor regulation                                                             | draft regulation                                | needless        |
| 10 48           | sample firms (x7)                                                                           | firms                                           | needless        |
| 10 49           | experienced chemical safety auditors                                                        | auditors                                        | needless        |
| 10 50           | our study's theoretical focus is                                                            | we focus on                                     | verb            |
| 10 51           | sufficient industry knowledge                                                               | sufficient knowledge                            | needless        |
| 10 52           | overall positive influence                                                                  | appreciation                                    | nebulous        |
| 10 53           | how to most efficiently achieve compliance                                                  | how to efficiently comply                       | verb            |
| 10 54           | target regulation (x7)                                                                      | the regulation                                  | needless        |
| 10 55           | messy and subjective compliance process                                                     | difficulties                                    | needless        |
| 10 56           | flawed new regulation                                                                       | flawed regulation                               | needless        |
| 10 57           | randomly assigned participation opportunity                                                 | participation                                   | needless        |
| 10 58           | average participation treatment effect                                                      | average effect of participation                 | preposition     |
| 10 59           | resource-constrained small- and medium-sized enterprises                                    | small and midsize firms                         | piled           |
| 10 60           | SMEs (x7)                                                                                   | midsize firms                                   | abbreviation    |
| 10 61           | rigorous difference-in-difference analysis                                                  | difference in differences                       | piled           |
| 10 62           | factory floor dependent variable Compliance                                                 | measure of compliance                           | piled           |

| <b>Ref. No.</b> | <b>Original</b>                                                                                         | <b>Revised</b>                                        | <b>Category</b> |
|-----------------|---------------------------------------------------------------------------------------------------------|-------------------------------------------------------|-----------------|
| 10 63           | 13.1 percentage points greater overall compliance                                                       | greater compliance by 6.4-13.1 percentage points      | piled           |
| 10 64           | political science's deliberative democracy and organizational behavior's procedural justice literatures | deliberative democracy and procedural justice         | piled           |
| 10 65           | deliberative democracy and procedural justice literatures                                               | deliberative democracy and procedural justice         | piled           |
| 10 66           | regimes' information gathering capabilities and responsiveness                                          | regimes' abilities to monitor and respond to citizens | piled           |
| 11 1            | the level of journalistic resources dedicated to coverage of local politics                             | journalism about local politics                       | nebulous        |
| 11 2            | whether this trend is demand- or supply-driven                                                          | whether demand or supply drives this trend            | verb            |
| 11 3            | local television station acquisitions                                                                   | acquisitions of television stations                   | preposition     |
| 11 4            | local news programming and viewership                                                                   | news and viewership                                   | needless        |
| 11 5            | significant rightward shift in the ideological slant                                                    | more conservative slant                               | needless        |
| 11 6            | substantial supply-side role                                                                            | supply drives                                         | verb            |
| 11 7            | could potentially be imposing negative externalities on the quality                                     | could be reducing the quality                         | needless        |
| 11 8            | local political information                                                                             | news about local politics                             | preposition     |
| 11 9            | local elected officials' positions                                                                      | local politicians                                     | needless        |
| 11 10           | news distribution technologies                                                                          | technology                                            | needless        |
| 11 11           | the modern news environment                                                                             | modern news                                           | needless        |
| 11 12           | late-twentieth century period of dominance by                                                           | late twentieth century dominated by                   | needless        |
| 11 13           | city paper's local focus                                                                                | local news                                            | needless        |
| 11 14           | limited and relatively high-cost alternatives                                                           | limited alternatives                                  | needless        |
| 11 15           | ideological or partisan polarization                                                                    | polarization                                          | needless        |
| 11 16           | cable news channel's content                                                                            | content                                               | needless        |
| 11 17           | highly partisan misinformation                                                                          | partisan misinformation                               | needless        |
| 11 18           | local television news broadcasts                                                                        | television broadcasts of local news                   | preposition     |
| 11 19           | large conglomerate owner                                                                                | conglomerate                                          | needless        |
| 11 20           | news program content                                                                                    | news content                                          | needless        |
| 11 21           | differences-in-differences design                                                                       | design                                                | needless        |
| 11 22           | roughly three percentage point increase                                                                 | increase of roughly three percentage points           | piled           |
| 11 23           | cross-station ideological distribution                                                                  | distribution of ideology across stations              | preposition     |
| 11 24           | more national politics coverage                                                                         | more coverage of national politics                    | preposition     |
| 11 25           | more locally focused and ideologically neutral coverage                                                 | local news without a political slant                  | preposition     |
| 11 26           | more nationally focused and ideologically conservative coverage                                         | national news with a conservative slant               | preposition     |
| 11 27           | local incumbent papers                                                                                  | local papers                                          | needless        |
| 11 28           | new, separately owned national outlet                                                                   | independent outlet                                    | needless        |
| 11 29           | nationally focused and ideologically unified content                                                    | the same national news                                | nebulous        |
| 11 30           | locally focused and ideologically diverse content                                                       | diverse local news                                    | nebulous        |
| 11 31           | locally tailored politics content                                                                       | local politics                                        | nebulous        |

| <b>Ref. No.</b> | <b>Original</b>                                                          | <b>Revised</b>                             | <b>Category</b> |
|-----------------|--------------------------------------------------------------------------|--------------------------------------------|-----------------|
| 11 32           | downstream election outcomes                                             | elections                                  | needless        |
| 11 33           | viewers' available information                                           | viewers' knowledge                         | needless        |
| 11 34           | accountability and preference aggregation functions                      | accountability and resolving disagreements | piled           |
| 11 35           | DMA (x43)                                                                | area                                       | abbreviation    |
| 11 36           | clearly identifiable partisan messaging                                  | partisan messaging                         | needless        |
| 11 37           | former Trump White House official                                        | former official of the Trump White House   | preposition     |
| 11 38           | experienced local news anchors                                           | experienced anchors                        | needless        |
| 11 39           | other non-national-politics segments                                     | other segments without national politics   | preposition     |
| 11 40           | former Bonten stations' content                                          | stations' content                          | needless        |
| 11 41           | moved to the right on the ideological dimension                          | became more conservative                   | nebulous        |
| 11 42           | existing Sinclair-owned stations                                         | other Sinclair stations                    | needless        |
| 11 43           | stations' same-market competitors                                        | stations' competitors in the same market   | preposition     |
| 11 44           | locally focused journalism                                               | local journalism                           | needless        |
| 11 45           | substantial post-acquisition drop                                        | substantial drop after acquisition         | preposition     |
| 11 46           | the set of downstream political outcomes                                 | the effects                                | needless        |
| 11 47           | state-level politics                                                     | state politics                             | needless        |
| 11 48           | can generate meaningful changes in the levels of local content           | can decrease local news                    | nebulous        |
| 11 49           | local-to-national shift                                                  | shift to national news                     | preposition     |
| 11 50           | ownership consolidation effects                                          | effects of ownership                       | preposition     |
| 11 51           | but have influence on                                                    | but influence                              | verb            |
| 11 52           | estimated average viewership decline                                     | average decline in viewership              | preposition     |
| 11 53           | median program-level viewership                                          | median viewership for programs             | preposition     |
| 11 54           | very high documented persistence                                         | persistence                                | needless        |
| 11 55           | individuals' TV news viewership                                          | people's viewership of TV news             | piled           |
| 11 56           | such non-switching viewers                                               | such viewers                               | needless        |
| 11 57           | the ideological valence of their news diet lurched rightward             | their news became more conservative        | nebulous        |
| 11 58           | DMA-level TV market share                                                | market share in each area                  | preposition     |
| 11 59           | market-level concentration statistics                                    | measures of whole markets                  | preposition     |
| 11 60           | numerous single-market operators                                         | many operators in different markets        | piled           |
| 11 61           | more locally-focused and ideologically moderate (pre-Sinclair) mix       | local news without a political slant       | piled           |
| 11 62           | more national-focused and ideologically conservative (post-Sinclair) mix | national news with a conservative slant    | piled           |
| 11 63           | centrally produced, nationally focused conservative segments             | national news with a conservative slant    | piled           |
| 11 64           | locally produced, less partisan content                                  | local news without a political slant       | piled           |
| 11 65           | short-term post-acquisition viewership drop                              | brief drop in viewership after acquisition | piled           |
| 12 1            | cosmopolitan immigration attitudes                                       | support for immigration                    | preposition     |
| 12 2            | contextual or compositional effects                                      | contact or education                       | nebulous        |
| 12 3            | pro-immigration people                                                   | supporters of immigration                  | preposition     |
| 12 4            | is a second-order manifestation of (x3)                                  | is a result of                             | nebulous        |
| 12 5            | deeper (demographic and cultural) divides (x3)                           | deeper divides in education and culture    | preposition     |
| 12 6            | longstanding economic debates                                            | longstanding debates                       | needless        |



| <b>Ref. No.</b> | <b>Original</b>                                                                     | <b>Revised</b>                                          | <b>Category</b> |
|-----------------|-------------------------------------------------------------------------------------|---------------------------------------------------------|-----------------|
| 12 7            | immigration inflows                                                                 | immigration                                             | needless        |
| 12 8            | neighboring 'culturally compatible' countries                                       | neighboring countries with similar cultures             | preposition     |
| 12 9            | overlapping attitudinal and geographic divides                                      | regional divide in opinions                             | preposition     |
| 12 10           | larger value divide                                                                 | divide in values                                        | preposition     |
| 12 11           | knowledge-based service sector economy                                              | knowledge economy                                       | needless        |
| 12 12           | left-right partisan divides                                                         | ideological divides                                     | piled           |
| 12 13           | twentieth-century political contestation                                            | in the twentieth century, political conflict            | preposition     |
| 12 14           | across the left-right political spectrum                                            | the left and right                                      | needless        |
| 12 15           | rural nationalist (Le Pen) perspective                                              | rural nationalists (Le Pen)                             | needless        |
| 12 16           | are more likely to have favorable opinions about immigrants                         | are more welcoming toward immigrants                    | nebulous        |
| 12 17           | contextual effects (x25)                                                            | contact with immigrants                                 | nebulous        |
| 12 18           | high population density environments                                                | dense populations                                       | nebulous        |
| 12 19           | have more exposure to immigrants                                                    | interact with more immigrants                           | nebulous        |
| 12 20           | have positive immigration attitudes                                                 | support immigration                                     | verb            |
| 12 21           | positive immigration attitudes (x19)                                                | support for immigration                                 | preposition     |
| 12 22           | compositional effects (x20)                                                         | education                                               | nebulous        |
| 12 23           | have positive attitudes about immigration                                           | support immigration                                     | nebulous        |
| 12 24           | with pro-immigration attitudes                                                      | who support immigration                                 | nebulous        |
| 12 25           | ESS (x25) / SHP (x17) / SOEP (x18)                                                  | European / Swiss / German surveys                       | abbreviation    |
| 12 26           | there is more variation in immigration attitudes across demographic characteristics | support for immigration varies more across demographics | verb            |
| 12 27           | geographic contexts (x19)                                                           | regions                                                 | nebulous        |
| 12 28           | of both demographic and cultural compositional effects                              | for education and contact                               | nebulous        |
| 12 29           | indicate variation in immigration attitudes across neighborhoods                    | indicate that opinions vary across neighborhoods        | verb            |
| 12 30           | specific neighborhood environments                                                  | specific neighborhoods                                  | needless        |
| 12 31           | neighborhood-level variation                                                        | differences between neighborhoods                       | preposition     |
| 12 32           | there are more positive attitudes about                                             | people are more positive about                          | nebulous        |
| 12 33           | greater ethnic heterogeneity                                                        | more ethnic diversity                                   | nebulous        |
| 12 34           | more negative immigration attitudes                                                 | hostility against immigration                           | preposition     |
| 12 35           | more positive immigration attitudes                                                 | more support for immigration                            | preposition     |
| 12 36           | to be contingent on very specific localized factors                                 | to depend on location                                   | nebulous        |
| 12 37           | Cosmopolitan-Nationalist polarization                                               | polarization between cosmopolitans and nationalists     | preposition     |
| 12 38           | there is a strong geographic component                                              | geography contributes                                   | verb            |
| 12 39           | contemporary large European cities                                                  | European cities                                         | needless        |
| 12 40           | different local economic and political contexts                                     | the local economy and local politics                    | piled           |
| 12 41           | local and national 'discursive contexts'                                            | local and national discussions                          | needless        |
| 12 42           | this process of being forced to share space may                                     | this interaction may                                    | needless        |
| 12 43           | as a basic coping mechanism for                                                     | to cope with                                            | verb            |
| 12 44           | larger immigrant populations                                                        | more immigrants                                         | needless        |
| 12 45           | rapidly changing population demographics                                            | rapid changes in demographics                           | preposition     |
| 12 46           | may promote a sense of threat and negative attitudes                                | may threaten people                                     | verb            |

| <b>Ref. No.</b> | <b>Original</b>                                                            | <b>Revised</b>                                          | <b>Category</b> |
|-----------------|----------------------------------------------------------------------------|---------------------------------------------------------|-----------------|
| 12 47           | urban-rural variation                                                      | differences between the city and countryside            | preposition     |
| 12 48           | attitudes should become more positive                                      | people should be more accepting                         | nebulous        |
| 12 49           | geographic context effects                                                 | geographic effects                                      | needless        |
| 12 50           | attitudinal time trends                                                    | changes in attitudes                                    | preposition     |
| 12 51           | long-term political socialization                                          | socialization                                           | needless        |
| 12 52           | highly skilled knowledge-economy jobs                                      | the knowledge economy                                   | needless        |
| 12 53           | less-educated and manual workers                                           | workers with less education                             | preposition     |
| 12 54           | higher socioeconomic status individuals                                    | people with more education                              | preposition     |
| 12 55           | distinctive multicultural environment                                      | diverse cultures                                        | nebulous        |
| 12 56           | with pro-immigration preferences                                           | who support immigration                                 | nebulous        |
| 12 57           | with anti-immigration preferences                                          | who oppose immigration                                  | nebulous        |
| 12 58           | broad attitudinal patterns                                                 | changes in attitudes                                    | needless        |
| 12 59           | cross-national comparability                                               | comparability across countries                          | preposition     |
| 12 60           | contextual and compositional effects hypotheses                            | the effects of contact and education                    | preposition     |
| 12 61           | with conventional cross-sectional analysis                                 | by analyzing cross-sections                             | verb            |
| 12 62           | city-level contextual effects                                              | the effect of living in cities                          | preposition     |
| 12 63           | neighborhood-level analysis                                                | to compare neighborhoods                                | needless        |
| 12 64           | neighborhood level (x12)                                                   | neighborhood                                            | needless        |
| 12 65           | great urban center (x46)                                                   | large city                                              | needless        |
| 12 66           | contextual effects robustness checks                                       | checking the effects of city life                       | verb            |
| 12 67           | nonrandom sample attrition                                                 | participants who dropped out                            | nebulous        |
| 12 68           | the most international cultural environments                               | the most multicultural communities                      | nebulous        |
| 12 69           | compositional and not contextual effects                                   | education rather than living in cities                  | preposition     |
| 12 70           | micro-level cultural sorting                                               | cultural sorting                                        | needless        |
| 13 1            | experimenter demand effects                                                | experimenter demand                                     | needless        |
| 13 2            | EDEs (x91)                                                                 | demand                                                  | abbreviation    |
| 13 3            | experimental participants / treatments / results / research / design (x47) | participants / treatments / results / research / design | needless        |
| 13 4            | online survey experiments                                                  | online surveys                                          | needless        |
| 13 5            | empirical political science subfields (x2)                                 | subfields of political science                          | preposition     |
| 13 6            | experimenter intent (x14)                                                  | the experimenter's expectations                         | nebulous        |
| 13 7            | treatment effect (x39)                                                     | effect                                                  | needless        |
| 13 8            | researcher expectations (x12)                                              | the researcher's expectations                           | nebulous        |
| 13 9            | a long-standing critique of social science experiments is that             | skeptics criticize experiments by arguing that          | verb            |
| 13 10           | outcome measures (x4)                                                      | measures                                                | needless        |
| 13 11           | extensive prior experience                                                 | extensive experience                                    | needless        |
| 13 12           | social science research (x3)                                               | research                                                | needless        |
| 13 13           | are attentive to researcher expectations                                   | attend to the researcher's expectations                 | verb            |
| 13 14           | prominent experimental designs                                             | prominent experiments                                   | needless        |
| 13 15           | directional treatment scheme                                               | direction manipulation                                  | nebulous        |
| 13 16           | subsequent experimental stimuli                                            | survey                                                  | needless        |
| 13 17           | observed treatment effects                                                 | effects                                                 | needless        |
| 13 18           | do not facilitate the confirmation of researcher hypotheses                | do not help confirm the hypotheses                      | verb            |
| 13 19           | for the design, implementation, and interpretation of                      | for how to design, implement, and interpret             | verb            |

| <b>Ref. No.</b> | <b>Original</b>                                                                                                | <b>Revised</b>                                   | <b>Category</b> |
|-----------------|----------------------------------------------------------------------------------------------------------------|--------------------------------------------------|-----------------|
| 13 20           | traditional survey experimental designs                                                                        | survey experiments                               | needless        |
| 13 21           | the practice of experimental social science research                                                           | experiments in the social sciences               | needless        |
| 13 22           | study recruitment materials                                                                                    | recruitment materials                            | needless        |
| 13 23           | "demand effects" represent a serious methodological concern with the potential to undercut supportive evidence | experimenter demand could undercut evidence      | needless        |
| 13 24           | from otherwise compelling research designs                                                                     | from compelling experiments                      | needless        |
| 13 25           | offering an artifactual, theoretically uninteresting explanation                                               | dismissing the results as an artifact            | nebulous        |
| 13 26           | social psychology laboratory studies                                                                           | laboratories in social psychology                | preposition     |
| 13 27           | that involve substantial researcher-subject interaction                                                        | where researchers interact with participants     | preposition     |
| 13 28           | survey instrument (x5)                                                                                         | survey                                           | needless        |
| 13 29           | in a survey context                                                                                            | in a survey                                      | needless        |
| 13 30           | these scope conditions guide                                                                                   | this scope guides                                | needless        |
| 13 31           | conveying demand characteristics to experimental participants in laboratory settings                           | conveying demand to participants in laboratories | needless        |
| 13 32           | methodological approach                                                                                        | method                                           | needless        |
| 13 33           | multi-round behavioral game                                                                                    | repeated game                                    | needless        |
| 13 34           | several experimentally manipulated attributes                                                                  | several attributes that are manipulated          | piled           |
| 13 35           | implicit racial attitudes                                                                                      | implicit attitudes about race                    | preposition     |
| 13 36           | limited empirical evidence (x2)                                                                                | limited evidence                                 | needless        |
| 13 37           | survey experimental context                                                                                    | survey experiments                               | needless        |
| 13 38           | in some survey settings                                                                                        | in some surveys                                  | needless        |
| 13 39           | survey researchers                                                                                             | researchers                                      | needless        |
| 13 40           | the researcher in a pretreatment consent script                                                                | the researcher who reads a consent script        | piled           |
| 13 41           | with attitudinal outcomes                                                                                      | that measure attitudes                           | nebulous        |
| 13 42           | broader experimental design                                                                                    | experiment                                       | needless        |
| 13 43           | would-be "helpful" subjects                                                                                    | agreeable subjects                               | needless        |
| 13 44           | an experiment's demand characteristics                                                                         | demand                                           | needless        |
| 13 45           | less cognitively taxing path                                                                                   | easy path                                        | needless        |
| 13 46           | the "good subject" perspective                                                                                 | experimenter demand                              | nebulous        |
| 13 47           | political science survey experiments                                                                           | survey experiments in political science          | preposition     |
| 13 48           | well-known experimental designs                                                                                | well-known experiments                           | needless        |
| 13 49           | high work approval rate                                                                                        | high rate of approval                            | preposition     |
| 13 50           | higher-quality respondent pools                                                                                | other pools of participants                      | preposition     |
| 13 51           | different experimental schemes                                                                                 | different manipulations                          | nebulous        |
| 13 52           | demand treatment scheme                                                                                        | demand treatments                                | needless        |
| 13 53           | labor market field experiment                                                                                  | field experiment on labor markets                | piled           |
| 13 54           | gradation / directional / incentive treatment scheme                                                           | gradation / direction / incentive treatments     | needless        |
| 13 55           | survey experimental research (x2)                                                                              | survey experiments                               | needless        |
| 13 56           | if the traditional EDE critique is valid                                                                       | if experimenter demand occurs                    | piled           |
| 13 57           | borderline statistically significant results                                                                   | borderline effects                               | needless        |
| 13 58           | negativistic research participants                                                                             | contrarian participants                          | nebulous        |
| 13 59           | of our incentive-based EDE interventions                                                                       | for the effects of incentives                    | nebulous        |
| 13 60           | borderline statistically significant five-percentage-point increase                                            | nonsignificant difference                        | needless        |

| Ref. No. | Original                                                                                                             | Revised                                                                                                 | Category    |
|----------|----------------------------------------------------------------------------------------------------------------------|---------------------------------------------------------------------------------------------------------|-------------|
| 13 61    | treatment effect estimates                                                                                           | treatment effects                                                                                       | needless    |
| 13 62    | differentially large treatment effects                                                                               | larger effects                                                                                          | needless    |
| 13 63    | typical political science survey experiment                                                                          | typical experiment in political science                                                                 | preposition |
| 13 64    | absolute value percentage-point shifts                                                                               | the absolute change in percentage points                                                                | preposition |
| 13 65    | inexpensive online participant pools                                                                                 | online participants                                                                                     | needless    |
| 14 1     | lead to regime collapse                                                                                              | collapse a regime                                                                                       | verb        |
| 14 2     | regime collapse / insiders / stability / longevity / breakdown / leaders / outsiders / weakness / institutions (x14) | collapse / insiders / stability / longevity / breakdown / leaders / outsiders / weakness / institutions | needless    |
| 14 3     | ruling party candidates                                                                                              | candidates from the ruling party                                                                        | preposition |
| 14 4     | authoritarian survival strategies (x2)                                                                               | authoritarian strategies                                                                                | needless    |
| 14 5     | essential political services                                                                                         | essential services                                                                                      | needless    |
| 14 6     | prominent electoral authoritarian regime (x2)                                                                        | prominent autocracy with elections                                                                      | preposition |
| 14 7     | simple cost-benefit framework (x2)                                                                                   | simple theory of costs and benefits                                                                     | preposition |
| 14 8     | weak formal institutions                                                                                             | weak institutions                                                                                       | needless    |
| 14 9     | future career advancement opportunities                                                                              | their career                                                                                            | needless    |
| 14 10    | significant autonomous political resources                                                                           | independent funds and supporters                                                                        | nebulous    |
| 14 11    | our theoretical framework                                                                                            | our theory                                                                                              | needless    |
| 14 12    | greater personal control                                                                                             | greater control                                                                                         | needless    |
| 14 13    | commit to power-sharing                                                                                              | commit to sharing power                                                                                 | verb        |
| 14 14    | Russian regional legislative elections                                                                               | regional elections                                                                                      | needless    |
| 14 15    | when the regional vote share of the party decreases                                                                  | when their votes in the region decrease                                                                 | preposition |
| 14 16    | regional economic performance                                                                                        | region's economy                                                                                        | needless    |
| 14 17    | legislative leadership positions                                                                                     | legislative offices                                                                                     | needless    |
| 14 18    | personalist regimes (x6)                                                                                             | authoritarian regimes                                                                                   | nebulous    |
| 14 19    | various autonomous political resources                                                                               | independent funds and supporters                                                                        | nebulous    |
| 14 20    | independent political machine                                                                                        | independent campaign                                                                                    | nebulous    |
| 14 21    | ruling party affiliation                                                                                             | affiliation with the ruling party                                                                       | preposition |
| 14 22    | micro-level, quantitative data                                                                                       | quantitative data on candidates                                                                         | nebulous    |
| 14 23    | spoil-sharing                                                                                                        | sharing the spoils                                                                                      | verb        |
| 14 24    | elite spoil sharing                                                                                                  | sharing spoils                                                                                          | verb        |
| 14 25    | with institutional constraints on the leader                                                                         | with institutions that constrain the leader                                                             | verb        |
| 14 26    | personalist leaders                                                                                                  | authoritarian leaders                                                                                   | nebulous    |
| 14 27    | autocratic regime stability                                                                                          | the stability of autocracies                                                                            | preposition |
| 14 28    | transitology school of democratization studies                                                                       | study of democratic transitions                                                                         | nebulous    |
| 14 29    | most prominent recent studies                                                                                        | prominent studies                                                                                       | needless    |
| 14 30    | regime-affiliated elites                                                                                             | elites                                                                                                  | needless    |
| 14 31    | PRI's local political machine                                                                                        | party                                                                                                   | nebulous    |
| 14 32    | post-Cold War era                                                                                                    | after the Cold War                                                                                      | preposition |
| 14 33    | power-sharing institutions                                                                                           | institutions for sharing power                                                                          | preposition |
| 14 34    | dominant party regimes                                                                                               | dominant parties                                                                                        | needless    |
| 14 35    | cross-national quantitative studies                                                                                  | quantitative studies comparing countries                                                                | piled       |
| 14 36    | micro-level, large-N dataset                                                                                         | large dataset of candidates                                                                             | nebulous    |
| 14 37    | autocratic elite coalitions                                                                                          | coalitions among autocrats and elites                                                                   | preposition |
| 14 38    | defections were more likely to occur                                                                                 | elites defected more often                                                                              | verb        |
| 14 39    | in the area of elite recruitment                                                                                     | when recruiting elites                                                                                  | verb        |
| 14 40    | competing appointment incentives                                                                                     | competing incentives for appointments                                                                   | preposition |
| 14 41    | Putin's consistently high popularity ratings                                                                         | Putin's popularity                                                                                      | needless    |

| Ref. No. | Original                                                                                                  | Revised                                                                      | Category    |
|----------|-----------------------------------------------------------------------------------------------------------|------------------------------------------------------------------------------|-------------|
| 15 1     | Stalin's coercive agricultural policy and collective punishment campaign (x2)                             | Stalin's campaign to starve and punish dissenters                            | verb        |
| 15 2     | rich micro-level data                                                                                     | rich data                                                                    | needless    |
| 15 3     | local political behavior                                                                                  | local politics                                                               | needless    |
| 15 4     | threaten retribution in response to opposition                                                            | threaten to punish dissenters                                                | verb        |
| 15 5     | political opportunity structure (x11)                                                                     | threat of punishment                                                         | nebulous    |
| 15 6     | in which post-repression behavior unfolds                                                                 | after repression                                                             | preposition |
| 15 7     | indiscriminate mass repression (x2)                                                                       | indiscriminate repression                                                    | needless    |
| 15 8     | adversarial sentiments                                                                                    | anger                                                                        | nebulous    |
| 15 9     | past repression (x6)                                                                                      | repression                                                                   | needless    |
| 15 10    | anti-regime sentiments                                                                                    | resentment                                                                   | nebulous    |
| 15 11    | previously suppressed anti-regime sentiments                                                              | resentment                                                                   | nebulous    |
| 15 12    | armed mobilization                                                                                        | armed conflict                                                               | nebulous    |
| 15 13    | the permissiveness of political conditions                                                                | the regime's permissiveness                                                  | nebulous    |
| 15 14    | politically motivated genocide                                                                            | political genocide                                                           | needless    |
| 15 15    | local famine lethality                                                                                    | the lethality of famines                                                     | preposition |
| 15 16    | plausibly exogenous changes                                                                               | changes                                                                      | needless    |
| 15 17    | heterogeneity in famine's behavioral effects                                                              | different effects on obedience                                               | nebulous    |
| 15 18    | anti-Soviet or anti-Russian views                                                                         | opinions against Soviets or Russians                                         | preposition |
| 15 19    | narrower empirical scope                                                                                  | narrower scope                                                               | needless    |
| 15 20    | in a specific political context                                                                           | for a specific regime                                                        | nebulous    |
| 15 21    | are dynamic and contingent on a changing contemporary context                                             | change over time                                                             | verb        |
| 15 22    | behavioral consequences                                                                                   | consequences                                                                 | needless    |
| 15 23    | the contemporary political context                                                                        | politics                                                                     | nebulous    |
| 15 24    | incentives for preference falsification                                                                   | the pressure to conform                                                      | nebulous    |
| 15 25    | regime's punitive capacity                                                                                | regime's threat                                                              | nebulous    |
| 15 26    | previously suppressed resentments                                                                         | resentments                                                                  | needless    |
| 15 27    | various adversarial behaviors                                                                             | opposition                                                                   | nebulous    |
| 15 28    | are equally reliant on extra-judicial killings and imprisonment of political opponents                    | rely on killing and imprisoning opponents                                    | verb        |
| 15 29    | large-scale government-run collectives                                                                    | large collectives run by the government                                      | piled       |
| 15 30    | subsequent local political behavior                                                                       | local politics                                                               | piled       |
| 15 31    | 1933-era Ukrainian rayon                                                                                  | Ukrainian rayon from 1933                                                    | piled       |
| 15 32    | second-order administrative subdivision                                                                   | second level of administrative subdivision                                   | preposition |
| 15 33    | rayon-level famine losses                                                                                 | famine losses by rayon                                                       | preposition |
| 15 34    | Moscow's local coercive leverage                                                                          | Moscow's threat                                                              | nebulous    |
| 15 35    | greater behavioral opposition                                                                             | greater opposition                                                           | needless    |
| 15 36    | electoral district-level voting results                                                                   | voting results by district                                                   | preposition |
| 15 37    | Our identification strategy exploits exogenous variation in local famine mortality due to weather shocks. | We assess causation by using differences in famine mortality due to weather. | nebulous    |
| 15 38    | historical monthly mean air temperature and precipitation data                                            | monthly means for temperature and precipitation                              | piled       |
| 15 39    | Reich's own coercive food extraction practices                                                            | Reich's own confiscation of food                                             | piled       |
| 15 40    | rayon-level Battlefield sacrifice scores                                                                  | scores for Battlefield sacrifice                                             | piled       |
| 15 41    | greater vote-mobilization capacity                                                                        | more appeal to voters                                                        | piled       |
| 15 42    | theoretically plausible alternative explanations                                                          | theories                                                                     | needless    |
| 15 43    | a contingent political legacy                                                                             | different effects                                                            | nebulous    |

| <b>Ref. No.</b> | <b>Original</b>                                                                                                      | <b>Revised</b>                                                         | <b>Category</b> |
|-----------------|----------------------------------------------------------------------------------------------------------------------|------------------------------------------------------------------------|-----------------|
| 15 44           | anti-Soviet behaviors                                                                                                | opposition                                                             | nebulous        |
| 15 45           | pro-Russian separatist forces                                                                                        | separatists allied with Russia                                         | piled           |
| 15 46           | past mass repression                                                                                                 | repression                                                             | needless        |
| 15 47           | behavioral challenges                                                                                                | challenges                                                             | needless        |
| 15 48           | patterns in other, vastly different environments                                                                     | repression in other regimes                                            | nebulous        |
| 15 49           | in less permissive environments                                                                                      | on punitive regimes                                                    | nebulous        |
| 15 50           | synthesis of two previously disconnected literatures                                                                 | synthesis of two literatures                                           | needless        |
| 16 1            | public discourse about lynching moved from open or tacit endorsement to widespread condemnation                      | the public transformed from endorsing lynching to widely condemning it | verb            |
| 16 2            | distant, un-supportive audiences                                                                                     | outside audiences                                                      | needless        |
| 16 3            | safely articulate counternarratives and condemnations                                                                | safely criticize and condemn lynching                                  | verb            |
| 16 4            | more and geographically dispersed coverage                                                                           | more coverage in a wider area                                          | preposition     |
| 16 5            | many "spectacle" lynchings                                                                                           | many spectacles of lynching                                            | preposition     |
| 16 6            | the particularly gruesome nature of the killing                                                                      | the gruesome killing                                                   | needless        |
| 16 7            | federal anti-lynching legislation (x4)                                                                               | federal legislation against lynching                                   | preposition     |
| 16 8            | how do public responses to violence move from acceptance to opprobrium?                                              | how does the public change from accepting violence to condemning it?   | verb            |
| 16 9            | the privatization of state coercive powers                                                                           | privatizing state coercion                                             | verb            |
| 16 10           | traditional local justifications                                                                                     | local justifications                                                   | needless        |
| 16 11           | national media market                                                                                                | national media                                                         | needless        |
| 16 12           | spatial and temporal variation in discourse                                                                          | how discourse varies by place and time                                 | verb            |
| 16 13           | greater and more geographically dispersed coverage                                                                   | more coverage in a wider area                                          | preposition     |
| 16 14           | county-year panel data                                                                                               | counties by year                                                       | piled           |
| 16 15           | was related to a decrease in the incidence of lynching                                                               | correlated with less lynching                                          | needless        |
| 16 16           | four observable implications                                                                                         | four implications                                                      | needless        |
| 16 17           | powerful local elites and stakeholders                                                                               | powerful elites                                                        | needless        |
| 16 18           | morally charged relationships                                                                                        | relationships                                                          | needless        |
| 16 19           | local cultural guidelines or understandings                                                                          | local culture                                                          | needless        |
| 16 20           | powerful local actors (x3)                                                                                           | powerful people                                                        | needless        |
| 16 21           | system justification theory                                                                                          | system justification                                                   | needless        |
| 16 22           | diagnostic framing ... and prognostic framing...                                                                     | by dictating when violence is justified                                | nebulous        |
| 16 23           | institutions through which public legitimation can be accomplished                                                   | institutions that legitimize violence                                  | verb            |
| 16 24           | while this coercion might take a variety of forms, in the extreme, this manifests in the shuttering of media outlets | this coercion includes shutting down media                             | needless        |
| 16 25           | hegemonic discourses                                                                                                 | the dominant culture                                                   | nebulous        |
| 16 26           | materially or morally valued relationships                                                                           | relationships                                                          | needless        |
| 16 27           | the dynamic of public legitimation can become self-reinforcing                                                       | public legitimation can reinforce itself                               | verb            |
| 16 28           | potentially valuable extra-local relationships                                                                       | these relationships                                                    | piled           |
| 16 29           | highly saturated media environments                                                                                  | places thoroughly covered by the media                                 | piled           |

| Ref. No. | Original                                                                                                                                                              | Revised                                                            | Category    |
|----------|-----------------------------------------------------------------------------------------------------------------------------------------------------------------------|--------------------------------------------------------------------|-------------|
| 16 30    | annual county-level rail networks                                                                                                                                     | rail networks in counties by year                                  | preposition |
| 16 31    | factual and normative frames                                                                                                                                          | facts and values                                                   | nebulous    |
| 16 32    | publicity played a pivotal role in undermining                                                                                                                        | publicity helped undermine                                         | needless    |
| 16 33    | at a theoretical level, the mechanisms of<br>publicity I propose contribute to our<br>understanding of                                                                | more generally, publicity helps<br>understand                      | needless    |
| 16 34    | de-legitimation of non-state violence                                                                                                                                 | when people condemn vigilantes                                     | nebulous    |
| 16 35    | Within these cases, increasing publicity is<br>likely to be consequential to the de-<br>legitimation of non-state violence when<br>three important conditions obtain. | Publicity tends to undermine vigilantes<br>under three conditions. | needless    |
| 16 36    | publicity and institutional approaches                                                                                                                                | publicity and institutions                                         | needless    |
| 17 1     | presents new causal estimates of<br>incarceration's effect on voting                                                                                                  | estimates how incarceration affects<br>voting                      | verb        |
| 17 2     | random case assignment process of a major<br>county court system                                                                                                      | court system that randomly assigns<br>courtrooms                   | verb        |
| 17 3     | first-time misdemeanor defendants (x5)                                                                                                                                | defendants for first-time misdemeanors                             | preposition |
| 17 4     | show no demobilization                                                                                                                                                | do not vote less                                                   | verb        |
| 17 5     | show substantial turnout decreases                                                                                                                                    | vote substantially less                                            | verb        |
| 17 6     | pre-arrest voter histories (x2)                                                                                                                                       | voting before the arrest                                           | preposition |
| 17 7     | large-scale, racially-disparate voter<br>demobilization                                                                                                               | racial disparity in deterring voters                               | piled       |
| 17 8     | misdemeanor criminal cases                                                                                                                                            | misdemeanors                                                       | needless    |
| 17 9     | have substantial impacts on                                                                                                                                           | impact                                                             | verb        |
| 17 10    | substantial political science literature                                                                                                                              | substantial literature in political science                        | preposition |
| 17 11    | causal identification (x2)                                                                                                                                            | causality                                                          | needless    |
| 17 12    | effect heterogeneity                                                                                                                                                  | different effects                                                  | nebulous    |
| 17 13    | "political socialization" processes                                                                                                                                   | political socialization                                            | needless    |
| 17 14    | may well make it less feasible for people to<br>vote                                                                                                                  | may prevent people from voting                                     | needless    |
| 17 15    | differential exposure to                                                                                                                                              | greater risk of                                                    | nebulous    |
| 17 16    | brings a causal approach to the question of                                                                                                                           | studies the causes that determine                                  | nebulous    |
| 17 17    | random courtroom assignment (x3)                                                                                                                                      | random assignment of courtrooms                                    | preposition |
| 17 18    | major county court system                                                                                                                                             | county courts                                                      | needless    |
| 17 19    | small, nonsignificant treatment effects                                                                                                                               | no significant effects                                             | needless    |
| 17 20    | show a decrease in turnout                                                                                                                                            | decrease turnout                                                   | verb        |
| 17 21    | differential arrest exposure                                                                                                                                          | different risks of arrest                                          | preposition |
| 17 22    | baseline voting propensities                                                                                                                                          | voting before an arrest                                            | nebulous    |
| 17 23    | vote history data                                                                                                                                                     | voting histories                                                   | needless    |
| 17 24    | instrumental variables approach                                                                                                                                       | instrumental variable                                              | needless    |
| 17 25    | produces causal estimates of the effect                                                                                                                               | estimates the effect                                               | verb        |
| 17 26    | an extremely large pool of people                                                                                                                                     | millions of people                                                 | needless    |
| 17 27    | "minor" criminal justice interactions                                                                                                                                 | minor punishments                                                  | nebulous    |
| 17 28    | future political participation                                                                                                                                        | voting                                                             | nebulous    |
| 17 29    | raise normative concerns                                                                                                                                              | are troubling                                                      | nebulous    |
| 17 30    | jail's demobilizing effects                                                                                                                                           | how jail discourages voting                                        | nebulous    |
| 17 31    | have a negative causal effect on                                                                                                                                      | deter                                                              | nebulous    |
| 17 32    | non-legally-disenfranchising                                                                                                                                          | do not legally prohibit voting                                     | nebulous    |

| <b>Ref. No.</b> | <b>Original</b>                                                                                                                                                                                        | <b>Revised</b>                                                                                                      | <b>Category</b> |
|-----------------|--------------------------------------------------------------------------------------------------------------------------------------------------------------------------------------------------------|---------------------------------------------------------------------------------------------------------------------|-----------------|
| 17 33           | "political socialization" and "resource" mechanisms                                                                                                                                                    | socialization and resources                                                                                         | needless        |
| 17 34           | criminal justice interactions                                                                                                                                                                          | interactions with the law                                                                                           | preposition     |
| 17 35           | experiencing criminal justice contact                                                                                                                                                                  | interacting with the law                                                                                            | preposition     |
| 17 36           | has substantial negative effects on people's attitudes toward government                                                                                                                               | worsens people's opinions of the government                                                                         | verb            |
| 17 37           | disempowering or punitive government interactions                                                                                                                                                      | disempowering or punishing people                                                                                   | verb            |
| 17 38           | I still anticipate that the process of learning about government described in this literature could play out in the case of misdemeanor jail terms, resulting in demobilization among potential voters | people could still learn to resent the government during jail terms for misdemeanors, discouraging them from voting | verb            |
| 17 39           | powerful "interpretive effects"                                                                                                                                                                        | powerful interpretations                                                                                            | needless        |
| 17 40           | carceral experiences                                                                                                                                                                                   | jail                                                                                                                | nebulous        |
| 17 41           | inmates' day-to-day activities                                                                                                                                                                         | inmates' lives                                                                                                      | needless        |
| 17 42           | may well yield experiences that cause people to                                                                                                                                                        | can make people                                                                                                     | needless        |
| 17 43           | can lead to job loss or major loss of income, loss of housing, and family disruption                                                                                                                   | can make someone lose their job, income, and housing, and can disrupt their family                                  | verb            |
| 17 44           | with different levels of available resources                                                                                                                                                           | with less resources                                                                                                 | needless        |
| 17 45           | little existing evidence                                                                                                                                                                               | little evidence                                                                                                     | needless        |
| 17 46           | jail is an especially likely place to find such demobilization                                                                                                                                         | jail is likely to discourage voting                                                                                 | needless        |
| 17 47           | engage in criminal behavior                                                                                                                                                                            | commit a crime                                                                                                      | nebulous        |
| 17 48           | barred from voting via felon disenfranchisement laws                                                                                                                                                   | barred from voting by the law                                                                                       | needless        |
| 17 49           | survey self-reports                                                                                                                                                                                    | surveys                                                                                                             | needless        |
| 17 50           | various matching or time-series approaches                                                                                                                                                             | matching or time series                                                                                             | piled           |
| 17 51           | fewer legal and social consequences                                                                                                                                                                    | fewer consequences                                                                                                  | needless        |
| 17 52           | lower-level crimes                                                                                                                                                                                     | minor crimes                                                                                                        | needless        |
| 17 53           | discretionary charging behavior                                                                                                                                                                        | biased charging                                                                                                     | needless        |
| 17 54           | Black Americans' disproportionate exposure to                                                                                                                                                          | that Black Americans endure more                                                                                    | piled           |
| 17 55           | defendants' pre-existing characteristics                                                                                                                                                               | defendants before arrest                                                                                            | preposition     |
| 17 56           | post-release voting behavior                                                                                                                                                                           | voting after the arrest                                                                                             | preposition     |
| 17 57           | pre-arrest voting habits                                                                                                                                                                               | voting before an arrest                                                                                             | preposition     |
| 17 58           | sufficient courtroom-level sentencing variation                                                                                                                                                        | sufficient variation in sentences across courtrooms                                                                 | preposition     |
| 17 59           | carry a causal interpretation and are consistent with a story of                                                                                                                                       | indicate that                                                                                                       | needless        |
| 17 60           | behind-bars "political socialization"                                                                                                                                                                  | inmates are socialized behind bars                                                                                  | piled           |
| 17 61           | seemingly minor criminal cases                                                                                                                                                                         | minor charges                                                                                                       | needless        |
| 17 62           | racially-disparate demobilization effects                                                                                                                                                              | racial disparity in deterred voting                                                                                 | piled           |
| 17 63           | the "compliers" in this IV analysis                                                                                                                                                                    | subjects in this study                                                                                              | nebulous        |
| 17 64           | general defendant population                                                                                                                                                                           | general population of defendants                                                                                    | preposition     |
| 18 1            | position-taking (x8)                                                                                                                                                                                   | policy positions                                                                                                    | nebulous        |
| 18 2            | cue-taking (x108)                                                                                                                                                                                      | learning from peers                                                                                                 | nebulous        |



| <b>Ref. No.</b> | <b>Original</b>                                                                        | <b>Revised</b>                                           | <b>Category</b> |
|-----------------|----------------------------------------------------------------------------------------|----------------------------------------------------------|-----------------|
| 18 3            | like-minded, trusted policy experts                                                    | trusted experts                                          | needless        |
| 18 4            | this self-selection process                                                            | these choices                                            | nebulous        |
| 18 5            | causal effects (x10)                                                                   | effects                                                  | needless        |
| 18 6            | prior causally-oriented research                                                       | previous experiments                                     | nebulous        |
| 18 7            | cues' effects in exogenous networks                                                    | how legislators learn from peers they were assigned to   | nebulous        |
| 18 8            | in naturally-occurring communication networks                                          | from peers they choose themselves                        | needless        |
| 18 9            | legislative field experiments (x2)                                                     | field experiments                                        | needless        |
| 18 10           | randomly-assigned information treatment                                                | information                                              | needless        |
| 18 11           | experimental results                                                                   | the results                                              | needless        |
| 18 12           | across an endogenous legislative network                                               | among legislators                                        | nebulous        |
| 18 13           | experimental results                                                                   | the results                                              | needless        |
| 18 14           | classic interview-based studies                                                        | studies with interviews                                  | preposition     |
| 18 15           | self-selected communication networks (x2)                                              | networks of legislators                                  | nebulous        |
| 18 16           | severe time constraints                                                                | urgent deadlines                                         | nebulous        |
| 18 17           | it is simply not feasible to expect any individual to develop detailed knowledge about | someone cannot learn the details about                   | needless        |
| 18 18           | individual information constraints                                                     | limited knowledge                                        | nebulous        |
| 18 19           | take her fully-informed position                                                       | choose wisely                                            | piled           |
| 18 20           | cue-taking is an important factor in legislative decision-making                       | legislators take advice from peers to decide on policies | verb            |
| 18 21           | randomization-based research designs (x2)                                              | randomized experiments                                   | nebulous        |
| 18 22           | ideologically-similar legislators (x2)                                                 | legislators with similar ideologies                      | preposition     |
| 18 23           | exposed to a randomized information treatment                                          | who received randomized information                      | needless        |
| 18 24           | new empirical approach                                                                 | new method                                               | needless        |
| 18 25           | naturally-occurring legislative networks                                               | networks of legislators                                  | preposition     |
| 18 26           | technical policy briefings                                                             | policy briefings                                         | needless        |
| 18 27           | directly treated legislators (x2)                                                      | legislators                                              | needless        |
| 18 28           | primary research question                                                              | primary question                                         | needless        |
| 18 29           | provided influential cues to                                                           | influenced                                               | verb            |
| 18 30           | rely on randomly-assigned communication networks                                       | randomly assign peers                                    | verb            |
| 18 31           | endogenous shocks to legislators' information                                          | observe what legislators learn                           | nebulous        |
| 18 32           | randomly-assigned, but realistic, information treatment                                | information that was randomly assigned                   | piled           |
| 18 33           | rigorous identification approach                                                       | experimental method                                      | nebulous        |
| 18 34           | treatment contagion                                                                    | learning from peers                                      | nebulous        |
| 18 35           | endogenous networks (x4)                                                               | peers they choose                                        | nebulous        |
| 18 36           | providing precisely-estimated cue-taking effects                                       | precisely estimating the effects of cues                 | verb            |
| 18 37           | heterogeneous treatment effects                                                        | different effects                                        | nebulous        |
| 18 38           | treatment effect (x30)                                                                 | effect                                                   | needless        |
| 18 39           | imperfectly informed decision-makers                                                   | people with limited knowledge                            | piled           |
| 18 40           | diverse empirical literature                                                           | diverse literature                                       | needless        |
| 18 41           | decision-making shortcuts                                                              | shortcuts                                                | needless        |
| 18 42           | endogenous relationship networks                                                       | networks of peers                                        | nebulous        |
| 18 43           | naturally-occurring relationship networks                                              | natural networks                                         | needless        |

| <b>Ref. No.</b> | <b>Original</b>                                                                                   | <b>Revised</b>                               | <b>Category</b> |
|-----------------|---------------------------------------------------------------------------------------------------|----------------------------------------------|-----------------|
| 18 44           | the self-selection that characterizes the network's formation                                     | the choice of peers                          | nebulous        |
| 18 45           | legislative voting networks                                                                       | networks of legislators                      | preposition     |
| 18 46           | other decision-making factors                                                                     | other factors                                | needless        |
| 18 47           | one solution to self-selection in endogenous networks                                             | one way to control for the choice of peers   | nebulous        |
| 18 48           | exogenous relationship networks                                                                   | networks where peers are assigned            | nebulous        |
| 18 49           | exogenous cue-taking networks                                                                     | assigned networks                            | nebulous        |
| 18 50           | it is not clear why we would expect significant cue-taking to occur between legislators           | legislators might not take advice from peers | needless        |
| 18 51           | exogenously-created relationship networks                                                         | assigned networks                            | nebulous        |
| 18 52           | forms of legislative decision-making                                                              | legislative decisions                        | needless        |
| 18 53           | important empirical question                                                                      | important question                           | needless        |
| 18 54           | endogenous networks are characterized by self-selection                                           | legislators choose their peers               | verb            |
| 18 55           | randomly assigning a treatment identifies its causal effect                                       | random assignment helps test for causality   | needless        |
| 18 56           | identifies the contagion effect of the treatment on subjects who are exposed to it through a peer | tests whether legislators learn from peers   | verb            |
| 18 57           | naturally-occurring networks                                                                      | natural networks                             | needless        |
| 18 58           | naturally-occurring information                                                                   | natural information                          | needless        |
| 18 59           | informational content                                                                             | the content of the briefings                 | nebulous        |
| 18 60           | unobtrusive, ordinary course-of-business manner                                                   | in the ordinary course of business           | needless        |
| 18 61           | authentic information treatments                                                                  | authentic briefings                          | nebulous        |
| 18 62           | legislators' relatively unfiltered individual policy priorities                                   | legislators' positions on many policies      | piled           |
| 18 63           | bill- and legislator-specific fixed effects                                                       | fixed effects for bill and legislator        | preposition     |
| 18 64           | bill and legislator-specific indicator variables                                                  | indicators for bill and legislator           | preposition     |
| 18 65           | operate under the belief                                                                          | believe                                      | verb            |
| 18 66           | strong non-interference assumptions about legislative behavior . . . are inappropriate            | legislators do influence each other          | verb            |
| 18 67           | novel, causally-oriented research design                                                          | novel experiment                             | nebulous        |
| 18 68           | numerous external validity concerns                                                               | concerns about external validity             | preposition     |
| 18 69           | different underlying causal pathway                                                               | different cause                              | needless        |
| 18 70           | important position-taking behavior                                                                | important form of position-taking            | preposition     |
